# 1 Mapping the complex transcriptional 2 landscape of the phytopathogenic 3 bacterium *Dickeya dadantii*

4 Raphaël Forquet,<sup>a</sup> Xuejiao Jiang,<sup>a</sup> William Nasser,<sup>a</sup> Florence Hommais,<sup>a</sup> Sylvie  
5 Reverchon,<sup>a</sup> Sam Meyer<sup>a</sup>

6 Université de Lyon, INSA-Lyon, Université Claude Bernard Lyon 1, CNRS, UMR5240, MAP, F-69622, France<sup>a</sup>

7 **ABSTRACT** *Dickeya dadantii* is a phytopathogenic bacterium that causes soft rot in  
8 a wide range of plant hosts worldwide, and a model organism for studying virulence  
9 gene regulation. The present study provides a comprehensive and annotated tran-  
10 scriptomic map of *D. dadantii* obtained by a computational method combining five  
11 independent transcriptomic datasets: (i) paired-end RNA-seq data for a precise re-  
12 construction of the RNA landscape; (ii) DNA microarray data providing transcriptional  
13 responses to a broad variety of environmental conditions; (iii) long-read Nanopore  
14 native RNA-seq data for isoform-level transcriptome validation and determination of  
15 transcription termination sites; (iv) dRNA-seq data for the precise mapping of transcrip-  
16 tion start sites; (v) *in planta* DNA microarray data for a comparison of gene expression  
17 profiles between *in vitro* experiments and the early stages of plant infection. Our re-  
18 sults show that transcription units sometimes coincide with predicted operons but are  
19 generally longer, most of them comprising internal promoters and terminators that  
20 generate alternative transcripts of variable gene composition. We characterise the  
21 occurrence of transcriptional read-through at terminators, which might play a basal  
22 regulation role and explain the extent of transcription beyond the scale of operons.  
23 We finally highlight the presence of noncontiguous operons and excludons in the *D.*  
24 *dadantii* genome, novel genomic arrangements that might contribute to the basal co-  
25 ordination of transcription. The highlighted transcriptional organisation may allow *D.*  
26 *dadantii* to finely adjust its gene expression programme for a rapid adaptation to fast  
27 changing environments.

28 **IMPORTANCE** This is the first transcriptomic map of a *Dickeya* species. It may there-  
29 fore significantly contribute to further progress in the field of phytopathogenicity. It  
30 is also one of the first reported applications of long-read Nanopore native RNA-seq in  
31 prokaryotes. Our findings yield insights into basal rules of coordination of transcrip-  
32 tion that might be valid for other bacteria, and may raise interest in the field of micro-  
33 biology in general. In particular, we demonstrate that gene expression is coordinated  
34 at the scale of transcription units rather than operons, which are larger functional ge-  
35 nomic units capable of generating transcripts with variable gene composition for a  
36 fine-tuning of gene expression in response to environmental changes. In line with re-  
37 cent studies, our findings indicate that the canonical operon model is insufficient to  
38 explain the complexity of bacterial transcriptomes.

39 **KEYWORDS:** phytopathogen, transcriptional regulation, transcription unit,  
40 transcriptional read-through, transcription start and termination sites

**Compiled** October 13, 2021

This is a draft manuscript, pre-submission

Address correspondence to Raphaël Forquet,  
raphael.forquet@insa-lyon.fr, Sam Meyer,  
sam.meyer@insa-lyon.fr.

Forquet et al.

## 41 INTRODUCTION

42 Classically, bacterial transcription is described with the model of Jacob and Monod  
43 based on operons, defined as sets of contiguous and functionally-related genes co-  
44 transcribed from a single promoter up to a single terminator (1). In recent years how-  
45 ever, accumulating studies demonstrated that most operons actually comprise inter-  
46 nal promoters and terminators, generating transcripts of variable gene composition,  
47 generally in a condition-dependent manner (2, 3, 4, 5). This phenomenon, also known  
48 as suboperonic regulation (6), might be compared to alternative splicing in eukary-  
49 otes (7) and demonstrates a higher complexity of bacterial transcriptional landscapes  
50 than previously thought. Besides, transcription has been shown to extend beyond  
51 operons (3, 8), the latter being actually part of larger functional genomic units, referred  
52 to as transcription units (TUs) throughout the manuscript.

53 While transcriptomic maps have been established for various bacteria including  
54 *Escherichia coli* (9), *Salmonella enterica* (10), *Bacillus subtilis* (2), *Streptococcus pneumo-*  
55 *niae* (4), *Campylobacter jejuni* (11), *Clostridium beijerinckii* (12), *Mycobacterium tuberculo-*  
56 *sis* (13), *Mycoplasma pneumoniae* (14), and the phytopathogen *Xanthomonas campestris* (15,  
57 16), they are still lacking for *Dickeya species*. This study aims to provide the first com-  
58 prehensive and annotated transcriptomic map of *Dickeya dadantii*, a Gram-negative  
59 phytopathogenic bacterium representative of the *Dickeya* genus that causes soft rot,  
60 a severe disease leading to tissue maceration and eventually plant death (17) in a wide  
61 range of plant hosts worldwide, including agriculturally important crops (18, 19, 20, 21,  
62 22).

63 The infection process involves an asymptomatic phase, where bacteria remain  
64 latent, penetrate and colonise plant tissues, consuming simple sugars and small solu-  
65 ble oligosaccharides available in the plant apoplast to grow exponentially (23). In this  
66 compartment, bacteria are exposed to acidic conditions (24) and oxidative stress (25)  
67 resulting from plant defences. When all nutrients are consumed in the apoplast, the  
68 symptomatic phase initiates. Bacteria produce plant cell wall degrading enzymes (mainly  
69 pectinases) leading to the soft rot symptoms, and start cleaving pectin, which is used  
70 as a secondary carbon source for a new round of growth (26). By causing a total de-  
71 struction of plant cells, the maceration of plant tissues releases both vacuolar and  
72 cytoplasmic components in the apoplast, exposing the bacteria to osmotic stress (23).

73 In order to characterise the *D. dadantii* transcriptional landscape, we used a com-  
74 bination of transcriptomic data generated *in vitro* in a broad range of growth and  
75 stress conditions reflecting some of the key environmental signals encountered dur-  
76 ing the plant infection process, and ensuring optimal reproducibility and quality of  
77 analysed RNAs (27, 28). Different techniques were used, providing complementary  
78 knowledge: high-resolution Illumina paired-end RNA-seq; DNA microarray; Nanopore  
79 native RNA-seq; dRNA-seq. These data were combined using an integrative computa-  
80 tional method developed for this study, allowing the inference of the RNA landscape  
81 and a validation of co-expression occurring among genes of the same TU. This anal-  
82 ysis provides a detailed and annotated map of the TUs defining the *D. dadantii* tran-  
83 scriptome, *i.e.*, the sets of contiguous co-expressed genes. We then quantitatively map  
84 transcription start and termination sites in the investigated conditions, and analyse the  
85 associated predicted promoter and terminator motifs. We show that TUs sometimes  
86 coincide with predicted operons but are generally longer, most of them exhibiting in-  
87 ternal promoters and terminators. We characterise the occurrence of transcriptional  
88 read-through at terminators, a mechanism proposed as a basal coordinator and reg-  
89 ulator of gene expression yet never explored in phytopathogens and still poorly un-  
90 derstood across genomes in general. We finally detect putative noncontiguous oper-

Mapping of *Dickeya dadantii* transcriptional landscape

ons and excludons in the *D. dadantii* genome. In order to validate the obtained transcriptional map, we analyse available *in planta* expression data, and show that TUs inferred from *in vitro* cultures are also co-expressed during the early stages of plant infection (29), suggesting that many of the analysed features are used by *D. dadantii* in the pathogenic context. This transcriptomic map might serve as a community resource to help elucidating the regulation of *D. dadantii* gene expression, including its virulence programme. It also provides insights into basal rules of coordination of transcription that might be valid for other bacteria, specifically for other *Dickeya* species for which a core genome of 1300 genes was identified by comparative genomics (30).

## RESULTS AND DISCUSSION

**Characterisation of *Dickeya dadantii* transcription units.** In order to generate a biologically relevant transcriptional map of *D. dadantii*, we combined and integrated four sets of transcriptomic data obtained from *in vitro* cultures subjected to different sugar sources, environmental stress factors (acidic, oxidative, osmotic stress), and variations of DNA supercoiling, reflecting a variety of conditions also encountered by bacteria in the course of plant infection. A fifth set obtained from bacteria grown *in planta* was used for validation. These data were collected by different experimental methods providing complementary information, as follows (a more detailed description of the datasets is provided in Materials and Methods).

Dataset 1 was generated from high-resolution Illumina paired-end, strand-specific RNA-seq covering 6 growth conditions: M63 minimal medium supplemented with sucrose, addition of polygalacturonate (PGA), a pectic polymer present in plant cell wall (31), and treatment by novobiocin, which induces a global and transient chromosomal DNA relaxation (32) in exponential or in early stationary phase. By providing short but precise sequencing reads at single base-pair resolution and high sequencing depth, this dataset yields precise and quantitative information on the RNA landscape.

Dataset 2 was generated from DNA microarray data covering 32 growth conditions, involving the presence of PGA and leaf extracts, and in each medium, a separate exposure to acidic, oxidative or osmotic stresses (28). This dataset provides a quantitative catalogue of genes' responses to a more comprehensive and detailed range of conditions than dataset 1, albeit of weaker spatial resolution.

Dataset 3 was generated from long-read Nanopore native RNA-seq in M63 minimal medium supplemented with glucose and PGA, pooled from samples obtained in both exponential and early stationary phases. This method allows native RNAs to be sequenced directly as near full-length transcripts from the 3' to 5' direction, with a weaker depth than the previous datasets. Only a few transcriptomes were analysed by this technique, mostly from viral and eukaryotic organisms (33, 34, 35, 36), and, to our knowledge, a single prokaryotic one (37). This dataset provides a direct isoform-level validation of the TUs, and an accurate definition of transcription termination sites.

Dataset 4 was generated from differential RNA sequencing (dRNA-seq) experiments carried out on four samples obtained by pooling RNAs from the large variety of environmental conditions of dataset 2 followed by treatment with Terminator exonuclease (TEX) prior to sequencing. TEX enzyme degrades processed 5'-monophosphate RNAs and consequently enriches the samples in primary 5'-triphosphate end transcripts (38), thus locating transcription start sites at single-nucleotide resolution.

Finally, dataset 5 was generated from *in planta* DNA microarray data, 6 and 24 hours post-inoculation of the model plant *Arabidopsis thaliana* (29), during the early stages of infection. Bacterial RNAs are difficult to isolate from plant tissues, especially during the symptomatic phase where phenolic compounds accumulate in decaying

Forquet et al.

140 tissues, explaining the lack of transcriptomic data during the late stages of infection.  
141 In spite of a limited variety of conditions, this dataset allows a comparison of gene  
142 expression profiles between *in vitro* and *in planta* experiments, and was used to val-  
143 idate the level of co-expression of genes within TUs during the early stages of plant  
144 infection.

145 This collection of diverse and complementary transcriptomic datasets provided a  
146 solid ground for precisely characterising the *D. dadantii* transcription units, rather than  
147 basing our analysis on genomic data alone as in most operon predictors (intergenic  
148 distances between genes, functional links among products). The employed algorithm  
149 is described in details in Materials and Methods. Shortly, in a first step, we analysed  
150 the RNA landscape from Illumina paired-end strand-specific RNA-Seq (dataset 1), en-  
151 suring good resolution and sufficient sequencing depth to obtain a quantitative signal  
152 for all genes. These data also allowed us to uncover 50 putative coding genes previ-  
153 ously unannotated, most of which exhibiting sequence homology with proteins from  
154 the *Dickeya* genus (Supplementary Tab. S1D). Putative TUs were defined by fusing ad-  
155 jacent genes as long as RNA fragments were found in their intergenic region, a signa-  
156 ture of co-transcription. Secondly, if genes within the same putative TU are indeed  
157 co-transcribed, they should exhibit strong correlation of expression in a wider range  
158 of conditions than those of dataset 1. This analysis was carried using the diversity of  
159 samples in our DNA microarray data (dataset 2), based on a customised hierarchical  
160 clustering framework (39). This second criterion (correlation of expression) provided  
161 an orthogonal cross-validation compared to the first one (intergenic RNA signal), and  
162 yielded a total of 2028 putative TUs along the *D. dadantii* genome. In a third step,  
163 these TUs were validated based on Nanopore native RNA-seq (dataset 3). We tested  
164 the presence of long native RNA reads overlapping adjacent genes belonging to the  
165 same TU, thus yielding a direct evidence of co-transcription. For 16% of adjacent gene  
166 pairs, no conclusion could be drawn because of insufficient coverage. For the others,  
167 co-transcription was confirmed in 92% of the cases; for the remaining 8%, the absence  
168 of a common RNA might be indicative of false positives, but for some of them, may  
169 also be due to the weak number of culture conditions included in dataset 3. Since  
170 the large majority of TUs defined from datasets 1 and 2 match the observations of  
171 Nanopore native RNA-seq, we favoured the latter hypothesis and retained all of them,  
172 with a confidence level reflecting the presence or absence of overlapping RNA reads  
173 (Supplementary Tab. S1A).

174 With this approach, we mapped the first layer of transcription organisation in *D.*  
175 *dadantii*. According to our findings, the 4211 protein-coding genes are organised into  
176 2028 transcription units (provided in Supplementary Tab. S1A), among which 1118 are  
177 monocistronic and 910 are polycistronic, ranging from 2 to 28 genes (Fig. 1A, 1B and  
178 Supplementary Tab. S5). At the genomic scale, we compared our results with those  
179 of Rockhopper, a popular operon predictor that uses expression data as well as ge-  
180 nomic information as input (40). 45% of predicted operons exactly coincide with a TU  
181 in our analysis (Fig. 1D), including known examples such as *smtAmukFEB* involved in  
182 chromosome partitioning (Fig. 2A) (41). Besides, many identified TUs are likely oper-  
183 ons of unknown functions and features (Fig. 2B), which represent interesting starting  
184 points to discover new transcriptional functional units. Remarkably, TUs are generally  
185 longer than predicted operons: the average TU (including monocistronic ones) con-  
186 tains 2.1 genes and the average polycistronic TU contains 3.4 genes, against 1.6 and  
187 3.1 respectively for predicted operons (Fig. 1C). Almost three quarters (73.5%) of all  
188 genes are co-transcribed in TUs, against 56.9% for predicted operons (Fig. 1A, Supple-  
189 mentary Tab. S5). Our results indicate that TUs are indeed larger functional genomic

Mapping of *Dickeya dadantii* transcriptional landscape

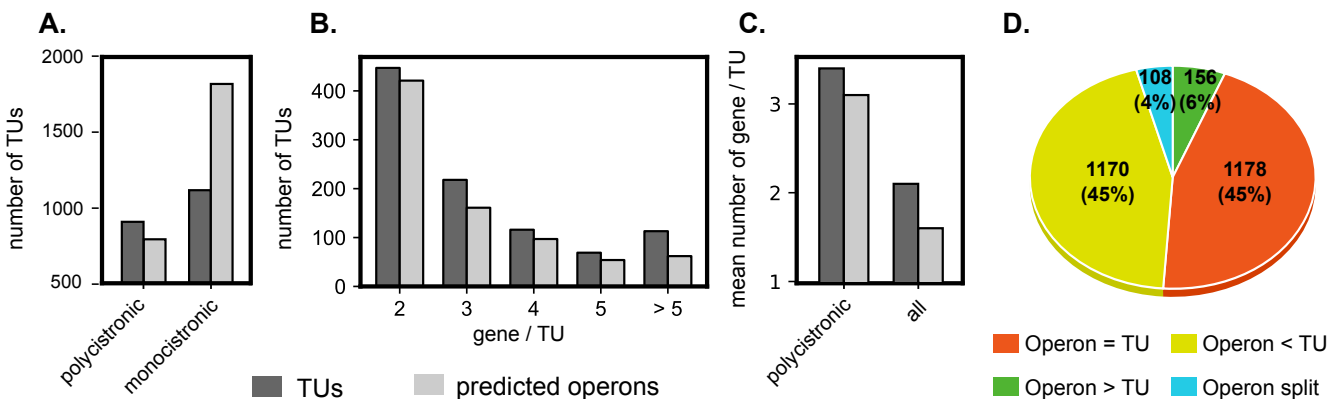

**FIG 1 (A) Repartition of monocistronic and polycistronic TUs identified by our analysis and comparison to predicted operons. (B) Size distributions. (C) Average number of genes per TU. (D) Fate of predicted operons that are mostly found as or within TUs in our algorithm.**

units, since 45% of predicted operons are extended by at least one gene (Fig. 1D), in agreement with recent findings in *E. coli* based on long-read sequencing (3).

As an example, the *sapABCDF* operon encoding a transporter involved in antimicrobial peptide resistance and virulence in numerous bacteria including *D. dadantii* (42) is extended to include the enoyl-acyl carrier protein reductase *fabI* that catalyses an essential step in the biosynthesis of fatty acids of the membrane (43) (Fig. 3B). It might be noted that *fabI* has a different genomic location in *E. coli* and is consequently not co-transcribed with *sapABCDF* in that species (44) although this synteny is conserved in other *Dickeya* genomes, showing that TUs can merge and/or vary over time at the evolutionary scale. Since these genes are functionally unrelated (except for a general relation with the membrane), the biological relevance and putative role of this event requires further investigation.

The *glg* genes involved in glycogen metabolism constitute another instructive example. They were initially classified in two separate operons in *E. coli* (45), and later identified as a single TU involving alternative transcripts of variable gene composition depending on growth conditions (46). The latter is also true in *D. dadantii* according to our findings (Fig. 3C), illustrating how transcription extends beyond the scale of the operon.

**Genome-wide identification of *D. dadantii* transcription start and termination sites.** Once *D. dadantii* transcription units were defined, the next step was to elaborate a map of transcription start sites (TSSs) and transcription termination sites (TTSs) for each TU along the genome. First, as mentioned above, dRNA-seq experiments were carried out to build a large library of 9313 putative TSSs at high-resolution (38) covering a wide range of *in vitro* cultures under growth and stress conditions also encountered during plant infection (dataset 4, Supplementary Tab. S2A). These were obtained by treating the RNA samples with TEX prior to sequencing, and the TSSer workflow was applied for a precise determination of TSS positions (48), followed by visual curation (Materials and Methods). For TTSs, two sets of putative positions were generated based on (i) Nanopore native RNA-seq (dataset 3), where transcripts are sequenced from the 3' ends, allowing the detection of 1165 TTS positions based on the enrichment of these ends downstream of gene stops (Supplementary Tab. S2D); (ii) genome-wide predictions of termination sites, based on the two main mechanisms of



Forquet et al.

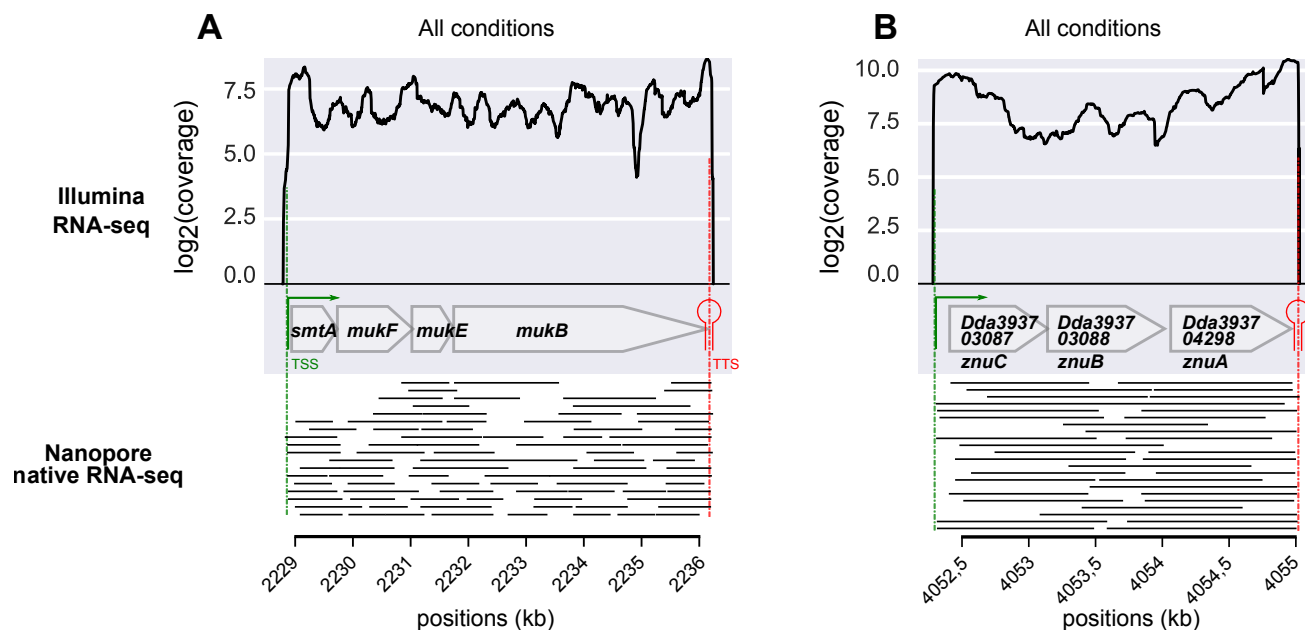

**FIG 2** Transcription units identified by our approach, and coinciding with operons. (A) Example of a known operon (*smtAmukFEB*). The bottom panel shows the coordinates of the long native RNA reads sequenced by Nanopore. (B) Identification of a new TU exhibiting uniform read coverage and strong internal cross-correlations (Supplementary Fig. S1A), clearly indicative of an operon. Its function was unknown but a homology analysis revealed that it corresponds to the cluster of genes *znuCBA*, a  $Zn^{2+}$  uptake system (47). Long reads are observed for all adjacent gene pairs in Nanopore native RNA-seq data, and even a fragment carrying the three genes for *znuCBA*.

transcription termination in bacteria. 3564 Rho-independent (intrinsic) TTSs and 5851 Rho-dependent (regulated) TTSs (49) were predicted using ARNold (50) and RhoTermPredict (51) programmes respectively (Supplementary Tabs. S2B and S2C).

A quantitative mapping of the transcription landscape was then performed in order to estimate the contribution of each TSS/TTS to its TU. While most comparable maps define TSSs/TTSs by their position only, we exploited the complementarity of the input data to also systematically analyse their magnitude (or strength) in the investigated conditions. The +TEX libraries, Nanopore reads and TTS predictions are not suitable for the latter purpose, which required building a second list of TSSs and TTSs of poorer resolution but quantitative magnitude from the non-treated paired-end RNA-seq data (dataset 1). Briefly, TSSs and TTSs were defined based on the enrichment in RNA fragment starts and stops upstream of gene starts and downstream of gene stops respectively, and the number of fragments associated to these sites across all samples was considered as the global strength. The lists obtained with the three methods (from datasets 1, 3 and 4) were then merged into a unified list of TSSs/TTSs of optimal spatial resolution, quantitative magnitude, and with an estimated level of confidence depending on the level of agreement between these datasets (see Materials and Methods). These TSSs and TTSs were then assigned to the TUs. In order to eliminate many very weak internal TTSs/TTSs (most of which likely have poor biological relevance), the latter were retained only if they yielded at least 15% of the total start/stop magnitude of the TU and were thus used at least in some of the investigated conditions. As a result, we defined a total of 2595 TSSs and 1699 TTSs (including internal ones) over all TUs (Supplementary Tab. S1A to S1C). Inevitably, some alternate TSSs/TTSs may be absent from these lists if they are specifically used in conditions not

Mapping of *Dickeya dadantii* transcriptional landscape

246 included in our datasets. Finally, a scan for promoter motifs, conducted with bTSS-  
247 finder (52), identified promoters upstream of 1848 (71%) TSSs in total (Supplementary  
248 Tab. S1B and Fig. 3). The absence of detected promoters for the remaining 29% TSSs  
249 was expected due to the limitations of such predictors (53). To evaluate the quality  
250 of our TSS definition, we compiled all experimentally determined TSSs in *D. dadantii*  
251 (by primer extension), and compared their positions to our findings (Supplementary  
252 Tab. S3). 45% displayed exactly the same position, 38% were distant by less than 5 nu-  
253 cleotides, and only 17% were distant by more than 6 nucleotides. Manually-annotated  
254 promoter elements from these studies also match our findings well (Supplementary  
255 Tab. S3).

256 **Characterisation of a complex transcriptional landscape.** The quantitative map-  
257 ping of TSSs and TTSs allowed us to refine the comparison of TUs and operons pre-  
258 sented above. According to our findings, only 20% of polycistronic TUs (181) exhibit  
259 a single promoter and terminator (Fig. 2 and 3A) and thus fit into the classical defi-  
260 nition of operons, and only 47% of these (85) are predicted as such by Rockhopper.  
261 The 80% remaining TUs (729) are complex (Fig. 3A). 32% (287) have at least one inter-  
262 nal TSS without any internal TTS, such as *sapABCDFfabI* (Fig. 3B). 37% (339) have both  
263 internal TSS(s) and TTS(s), such as *glgBXCAP* (Fig. 3C) and *pelCZ* (Fig. 3D). Finally, 11%  
264 (103) have at least one internal TTS without any internal TSS such as *rhlB-gppA-pehV*  
265 (Fig. 4A), *pelD-paeY-pemA* (Fig. 4B) and *gcvTHP* (Fig. 6). Most *D. dadantii* TUs can conse-  
266 quently generate alternative transcripts of variable gene composition, resulting in a  
267 dense and complex transcriptional landscape.

268 A notable feature of complex TUs is the heterogeneity of transcription levels along  
269 the genes due to internal TSSs / TTSs, usually in a condition-dependent manner, re-  
270 sulting in a moderate correlation in the expression of genes within the TU (9). As  
271 an example, in the *sapABCDFfabI* TU (Fig. 3B), *fabI* is expressed both as part of the  
272 entire transcript and as an independent transcript generated from a strong internal  
273 TSS, explaining the lower correlation between *fabI* and the remaining genes (Supple-  
274 mentary Fig. S1B). In *glgBXCAP* (Fig. 3C), alternative transcripts of variable gene com-  
275 position can be generated depending on TSS and TTS usage. Another example rele-  
276 vant to plant infection is the *pelCZ* cluster (Fig. 3D) encoding two endopectate lyases  
277 secreted by *D. dadantii* which degrade pectin contained in plant cell walls (56). The  
278 substrates of Pel enzymes are pectic oligomers, e.g. PGA, that act as inducers of *pel*  
279 expression (31). The *pelCZ* genes were previously shown by Northern blotting to be co-  
280 transcribed into a single polycistronic transcript under inducing conditions by PGA, in  
281 addition to the two monocistronic mRNAs encoded by *pelC* or *pelZ* under non-inducing  
282 conditions (55). Our present findings are in full agreement with these observations,  
283 as *pelCZ* is detected as a single TU harbouring one internal TSS and TTS, each giving  
284 rise to monocistronic transcripts. In our data, *pelCZ* expression profiles are similar in  
285 presence or absence of PGA in spite of a drastically different global expression level  
286 (Supplementary Fig. S1D), suggesting that in absence of inducer, this very low level  
287 previously prevented a reliable detection of the entire transcript. Altogether, our find-  
288 ings clearly indicate that the canonical operon model is insufficient to explain the com-  
289 plexity of the *D. dadantii* transcriptional landscape, in line with results in many other  
290 organisms (2, 3, 4, 5). The existence of alternative entry and exit points for RNA Poly-  
291 merase inside TUs allows the cells to adjust the relative expression level of adjacent  
292 genes within a global coordination of expression of the entire TU (Fig. 3) that may al-  
293 low, in the case of *D. dadantii* during plant infection, a rapid adaptation to changing  
294 environment.

Forquet et al.

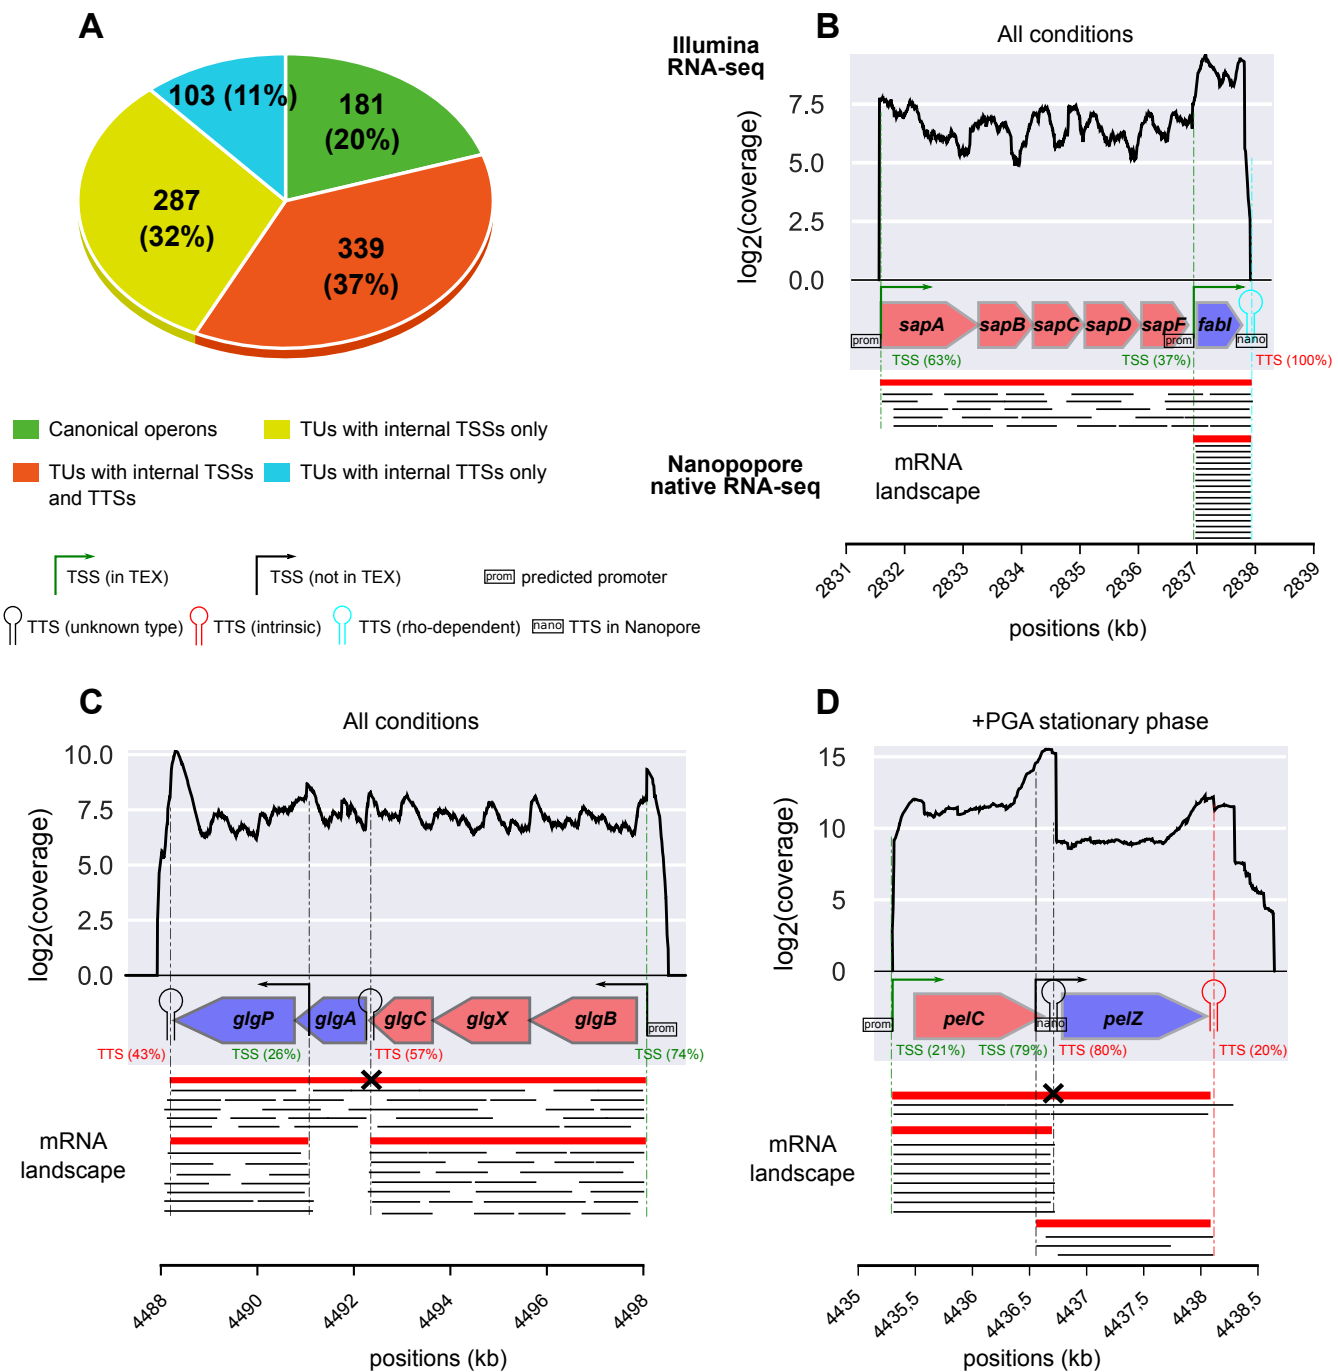

**FIG 3** (A) Characteristics of TUs. (B) The *sapABCDF* and *fabI* genes, predicted by Rockhopper (40) as two separate (red and blue) operons, were identified as a single TU, with a strong internal TSS expressing *fabI* alone. The bottom panel indicates the different isoforms (red) and the long reads sequenced by Nanopore native RNA-seq (black). The latter overlap all adjacent gene pairs, providing a direct evidence for co-transcription. (C) The *glg* genes were identified as a single TU (involving several isoforms) containing two separate predicted operons (blue and red genes), as suggested by the uniform read coverage, long reads from Nanopore native RNA-seq (bottom), and in line with results in *E. coli* (3, 54, 46). (D) Identification of the *pelCZ* TU with different isoforms depending on the condition, as previously determined (55). The two genes are split into different operons by Rockhopper. A strong internal TSS, followed by a strong TTS, contributes to the complexity of its expression (see text). Long reads corresponding to the different mRNA isoforms (*pelC*, *pelZ*, or *pelCZ*) are observed.



295 **Transcriptional read-through, the root of transcription extension ?** We showed  
296 that transcription units comprise predicted operons, yet are generally longer. This ex-  
297 tension of transcription might, in part, result from the ability of RNA Polymerase to  
298 stochastically override an imperfect terminator by a mechanism referred to as tran-  
299 scriptional read-through (3, 8). The latter has long been identified in specific oper-  
300 ons (57, 58, 59) and was shown more recently to be widespread in bacterial genomes (2,  
301 3, 8), where it may in fact play a basal coordination and regulation role (5). A condition-  
302 independent rate of stochastic termination might result in the co-expression of the  
303 genes located before and after the TTS (as in a classical operon), but with a reduced  
304 transcriptional level of the latter, a mechanism possibly relevant to functionally re-  
305 lated genes that must be expressed at different strengths while keeping a constant  
306 ratio (59). The termination efficiency can also be subject to regulation, depending on  
307 environmental conditions and metabolic needs, resulting in a variable degree of read-  
308 through and thus of relative expression levels (57, 58). Such conditional read-through  
309 can involve Rho and other proteins assisting termination (60, 61, 62, 63) as well as  
310 other conditional premature termination mechanisms such as attenuation (64, 65), T-  
311 box conditional termination (66, 67) and riboswitches (68, 69).

312 An example of condition-independent read-through occurs at the *rhIB-gppA-pehV*  
313 TU (Fig. 4A and Supplementary Fig. S1C). The *rhIB* gene encodes a component of the  
314 RNA degradosome (70, 71) whereas *gppA* encodes guanosine 5'-triphosphate 3'-diphosphate  
315 (pppGpp) pyrophosphatase involved in bacterial stringent response (72) and the *pehV*  
316 gene encodes a polygalacturonase involved in pectin degradation (73). These genes  
317 are functionally unrelated (except for a distant link to nutritional stress) yet appear  
318 co-transcribed, which is in fact quite frequent among operons (41, 74). This TU ex-  
319 hibits a variable expression level (by up to 50%) across the sampled conditions, but  
320 the internal (relative) expression pattern is condition-independent: *rhIB* and *gppA* are  
321 expressed at a similar level, whereas *pehV* is systematically less transcribed (Fig. 4A  
322 and and Supplementary Fig. S1C). This observation is correlated with the presence of  
323 an intrinsic internal TTS downstream of *gppA*. By computing the expression ratio of  
324 *pehV* compared to *rhIB/gppA*, we inferred the associated termination probability (or  
325 terminator strength) and found a constant value  $P(TTS_{gppA}) = 92 \pm 1\%$  (95% confi-  
326 dence interval) characteristic of a non-conditional transcriptional read-through. Thus,  
327 the three genes are co-transcribed from a single promoter of condition-dependent ac-  
328 tivity, with a reduced transcriptional level of *pehV* exhibiting a constant ratio (8%) com-  
329 pared to the other genes. The biological relevance of this mechanism remains to be  
330 clarified. In *E. coli*, *rhIB* and *gppA* were also recently shown to be co-transcribed (3, 54).  
331 Another example of condition-independent read-through occurs at the *gcvTHP* TU in-  
332 volved in glycine cleavage (75) (Fig. 6). We detected an internal TTS downstream of  
333 *gcvH* in accordance with studies in *E. coli* (3, 54) and inferred its termination probabil-  
334 ity  $P(TTS_{gcvH}) = 71 \pm 22\%$  (95% confidence interval), based on the expression ratio of  
335 *gcvP* compared to *gcvT* and *gcvH* across RNA-seq conditions. It is unclear whether this  
336 variability is due to RNA-seq signal variations or a weak regulation of the termination  
337 rate. The GcvT, H, and P proteins are part of the glycine cleavage system with GcvL (76),  
338 and GcvP activity might be required at lower concentration in the investigated condi-  
339 tions.

340 By definition, all identified internal TTSs (549) experience transcriptional read-through.  
341 As a rough estimate, condition-independent read-through was detected for 77 (14%)  
342 of internal TTSs, based on the constant expression ratio of the genes located down-  
343 stream vs upstream across RNA-seq conditions (Fig. 4, Materials and Methods). The  
344 remaining internal TTSs rather experience condition-dependent read-through; how-

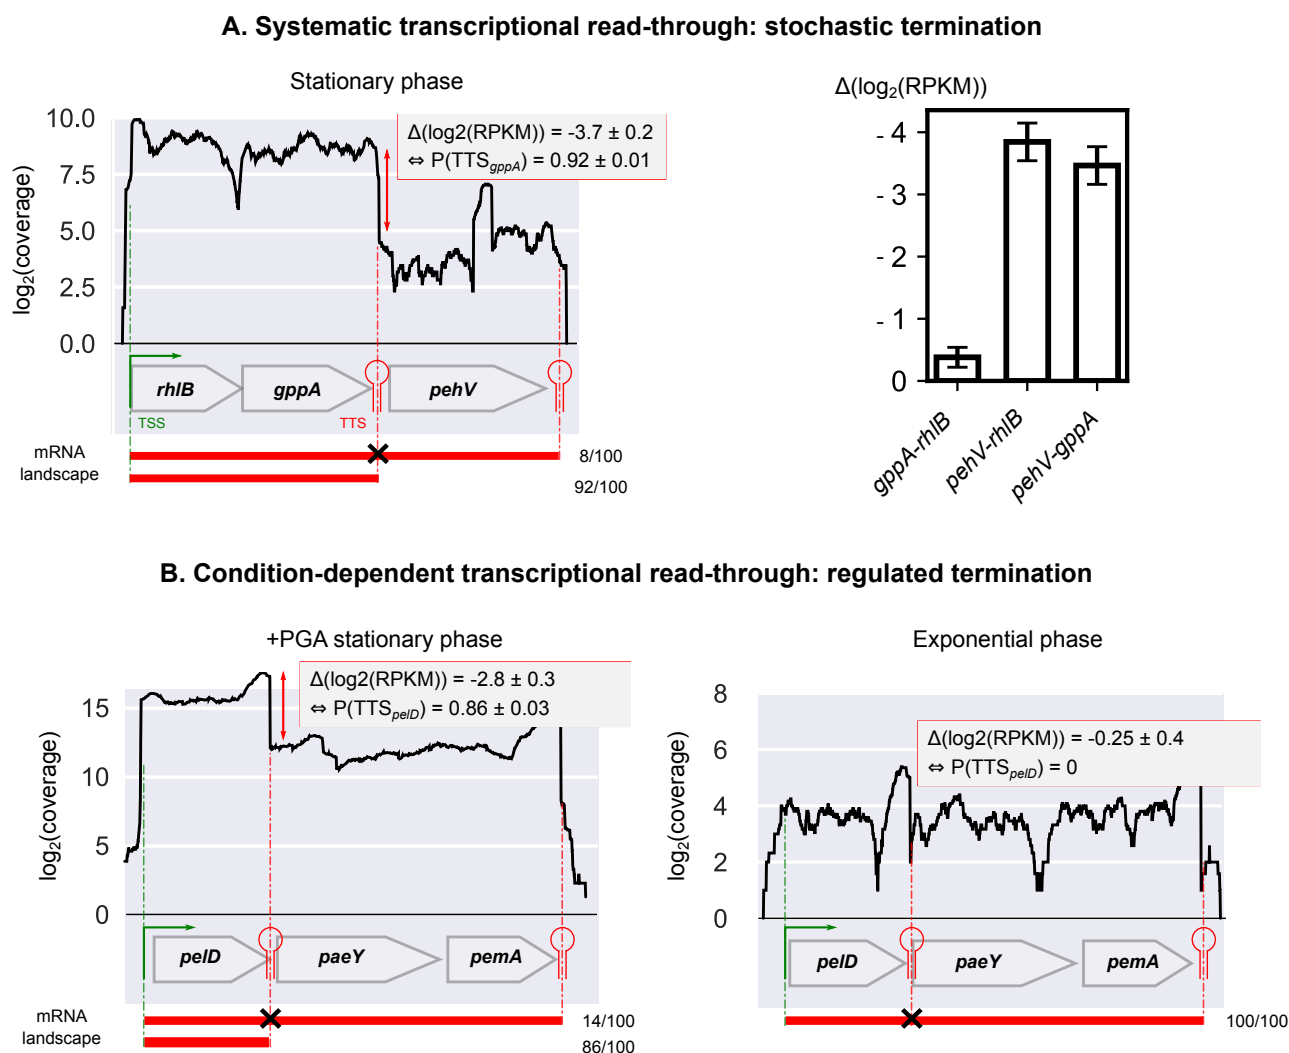

**FIG 4** Quantification of transcriptional read-through. (A) Non-conditional read-through: example of the *rhIB-gppA-pehV* TU (left panel). The first two genes are homogeneously transcribed among conditions, resulting in an expression variation  $\Delta(\log_2(RPKM))$  close to 0 (right panel, 95% confidence intervals are shown), while the intrinsic TTS downstream of *gppA* is stochastically overstepped in  $8 \pm 1\%$  of transcripts ( $P(TTS_{gppA}) = 0.92 \pm 0.01$ ), resulting in two different isoforms (red). (B) Condition-dependent read-through: example of the *pelD-paeY-pemA* TU. A TTS is identified downstream of *pelD* in agreement with previous studies (75). Its termination probability is regulated and depends on growth phase and presence of PGA ( $0.86 \pm 0.03$  vs 0), besides a global up- or down-regulation of the whole TU. All mRNA isoforms are observed in Nanopore native RNA-seq data (Supplementary Fig. S2A and S2B).

Mapping of *Dickeya dadantii* transcriptional landscape

345 ever, the systematic estimation of stochastic termination rates at internal TTSs is del-  
346 icate based on our data only, due to the limited number of RNA-seq conditions and  
347 the presence of nearby TSSs that contribute to the heterogeneous expression levels  
348 along the TU, as illustrated by *pelCZ* (Fig. 3D).

349 An example of condition-dependent read-through occurs at the *pelD-paeY-pemA*  
350 TU (Fig. 4B and Supplementary Fig. S2B), which is identified by our approach but was  
351 also characterised by Northern blotting (77). It encodes three genes involved in pectin  
352 degradation. In the initial step of pectinolysis occurring in plants, *paeY* (acetylesterase)  
353 and *pemA* (methylsterase) remove acetyl and methyl groups from pectin, which can  
354 then be efficiently degraded by the pectate lyase *pelD* (17). The *pelD* gene is essen-  
355 tially transcribed as a monocistronic RNA, although its terminator (predicted as intrinsic)  
356 can be overstepped to generate a polycistronic transcript comprising the three  
357 genes (77). In exponential phase, the three genes are homogeneously (but weakly)  
358 transcribed as a unique polycistronic RNA, suggesting that the internal TTS is not effi-  
359 cient ( $P(TTS_{pelD}) = 0\%$ ). In stationary phase in presence of PGA, the whole TU is  
360 up-regulated, and the internal TTS becomes more efficient ( $P(TTS_{pelD}) = 86 \pm 3\%$ , 95%  
361 confidence interval), resulting in the extensive synthesis of the *pelD* monocistronic RNA  
362 and a lower expression level of the two downstream genes. The regulation events oc-  
363 ccurring at this TTS remain to be characterised, but may adjust the relative expression  
364 levels of the genes following metabolic needs, since PelD has a predominant role in  
365 pectin degradation and virulence (78, 79) and must likely be required at much higher  
366 concentrations than the two other enzymes. In addition, the fact that *pemA* is differ-  
367 entially expressed depending on the degree of pectin methylation (80) highlights the  
368 relevance of adjusting the relative expression levels of the three genes depending on  
369 plant cell-wall composition.

370 Another example occurs at the *cytABCD* TU (Supplementary Fig. S2C and S3A). In  
371 addition to plants, *D. dadantii* is able to infect insects (81), during which this TU ex-  
372 presses four insecticidal toxins and was previously shown to produce a polycistronic  
373 mRNA comprising the four genes, besides the possible existence of alternative iso-  
374 forms (82). The sequencing coverage together with the putative internal intrinsic TTS  
375 detected after *cytA* are clearly indicative of a condition-dependent read-through, with  
376 termination occurring less efficiently at *cytA* in stationary phase in presence of PGA  
377 compared to exponential phase. This variation in termination efficiency at *cytA* asso-  
378 ciated to an environmental change may again allow tuning the relative amounts of  
379 the corresponding toxins, especially if a precise and condition-dependent balance be-  
380 tween them is required for optimal activity during the insect infection process (82).  
381 Interestingly, this cluster of four genes was acquired by horizontal transfer. Since  
382 transcriptional read-through partly relies on basal RNA Polymerase / TTS interactions,  
383 it might be conserved during horizontal transfer among bacterial species without re-  
384 quiring an independent acquisition of regulatory signals and their integration in the  
385 transcriptional regulatory network of the recipient cell.

386 **Detection of putative excludons and noncontiguous transcriptions units.** All  
387 previous examples involved genes located on the same DNA strand; yet recent studies  
388 also describe interactions between overlapping antisense coding transcripts, involved  
389 in a mutual regulation. In particular, noncontiguous operons refer to operons that con-  
390 tain a gene or group of genes that is transcribed in the opposite direction (83). 83 TUs  
391 with such features were found in the *D. dadantii* genome (provided in Supplementary  
392 Tab. S4A). Among them, an example is the *indCvfmAZBCDFG* TU encoding a compo-  
393 nent of the *vfm* quorum sensing system required for the production of plant cell wall-  
394 degrading enzymes (Fig. 5 and Supplementary Fig. S2D) (84). The *vfmE* gene, located

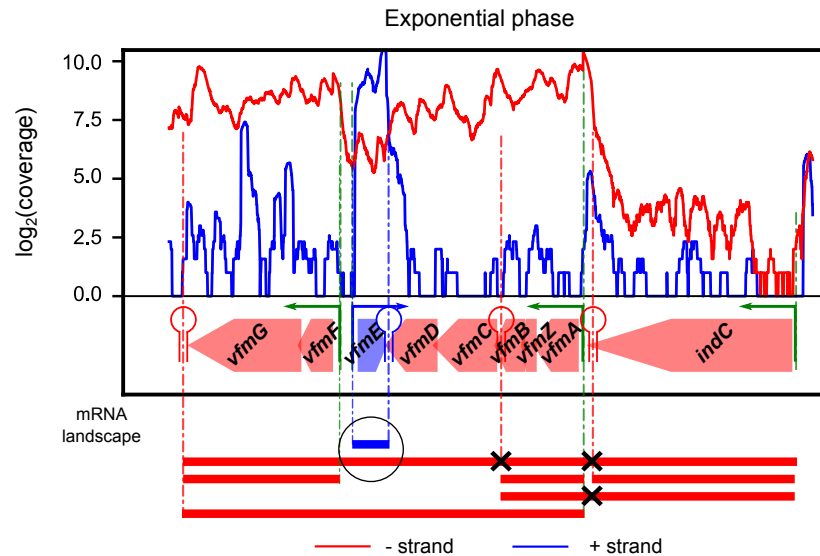

**FIG 5** Existence of a potential noncontiguous transcription unit in the *vfm* locus. The *vfmE* gene is transcribed in the opposite direction of the *indCvfmAZBCDFG* TU, generating two overlapping mRNAs (as shown in red/blue for the  $-/+$  strand) that might be involved in a mutual regulation (see text). All mRNA isoforms are observed in Nanopore native RNA-seq data (Supplementary Fig. S2D), including a long native RNA read on the negative strand between *vfmD* and *vfmF*.

395 on the opposite strand and within this TU, is also part of this system and known to  
 396 encode a transcriptional activator of the *vfm* locus (of the AraC family). Since all genes  
 397 of the TU are co-transcribed within a single mRNA, it is likely that these two overlap-  
 398 ping antisense transcripts could negatively regulate each other, e.g. by transcriptional  
 399 interference (RNA Polymerases collision) or RnaseIII-mediated double-stranded RNA  
 400 processing (85). An expression increase of the *vfm* locus would then reduce the expres-  
 401 sion of *vfmE*, and in turn its own expression, forming a genome-embedded negative  
 402 feedback loop controlling the production of quorum sensing signal and plant cell-wall  
 403 degrading enzymes (86).

404 Finally, “excludons” refer to genomic regions in which convergent or divergent  
 405 genes display overlapping transcription (87). From the map of transcription start and  
 406 termination sites, we found 160 putative convergent excludons (overlapping 3’ UTRs)  
 407 and 63 putative divergent excludons (overlapping 5’ UTRs) (provided in Supplemen-  
 408 tary Tab. S4B). An example is the divergent excludon between *greB* and *ompRenvZ*  
 409 transcription units, encoding a transcript cleavage factor required for effective tran-  
 410 scription elongation (88) and a two-component signal transduction system involved  
 411 in osmotic stress response (89), respectively (Supplementary Fig. S3B). Both TUs com-  
 412 prise long 5’UTRs, forming a region of overlapping transcription that was previously  
 413 identified in *E. coli* (90) and might underpin a mutual post-transcriptional regulation.

414 ***In planta* co-expression validation of the transcription units.** While our tran-  
 415 scriptional map was inferred from *in vitro* cultures, where RNAs could be extracted  
 416 with optimal quality and reproducibility, we wished to test if the identified TUs could  
 417 play a role in conditions of plant infection. We analysed a set of expression data ob-  
 418 tained *in planta* by DNA microarrays, during the early stages of *Arabidopsis thaliana*  
 419 infection (dataset 5) (29), 6 hours post-inoculation, during the epiphytic colonisation  
 420 of leaf surface, and 24 hours post-inoculation during leaf invasion, just before the  
 421 onset of visible symptoms. Overall, among the 50% gene pairs most correlated *in*  
 422 *planta*, 80% belong to the same TUs, suggesting that co-transcription of these genes

Mapping of *Dickeya dadantii* transcriptional landscape

423 may indeed likely occur in these conditions (Supplementary Fig S4A). As an example,  
424 in *cytABCD*, the four genes are also highly correlated *in planta*, while this correlation  
425 immediately drops in surrounding isodirectional TUs (Supplementary Fig. S4B), as we  
426 expected. However, comparable correlations might also arise between other genes  
427 that are not transcribed together, but share the same transcriptional regulators, in  
428 particular those involved in virulence such as KdgR, PectT, PectS (91), thus accounting  
429 for the 20% strongly correlated gene pairs not located in the same TU. For example,  
430 in the *pelCZ* complex TU involved in pectinolysis, both genes are strongly correlated *in*  
431 *planta* (Supplementary Fig. S4C), as expected from the previous *in vitro* observations  
432 (especially with PGA, Supplementary Fig. S4C), but the adjacent *pelB* gene is also cor-  
433 related, whereas *crp* and *mrcA* are not. This is not surprising, since most *pel* are par-  
434 alogous genes with similar regulators and are strongly induced by pectin. The same  
435 pattern is observed for the *pelD-paeY-pemA* TU (Supplementary Fig. S4D), with respect  
436 to the *pelE* and *pelA* genes located upstream on the same strand. Because of the lim-  
437 ited spatial resolution of microarrays and the weak number of investigated conditions,  
438 it is not possible to systematically distinguish the effects of these two mechanisms at  
439 the genomic scale from these data, but a survey of representative TUs confirmed that  
440 they usually coincide with correlated blocks of genes (as observed with *cytABCD*), even  
441 when the latter do not belong to the same functional pathways.

442 As an example, the complex TU *sufABCDSE-ldtC* is composed of two functionally  
443 unrelated operons (Supplementary Fig. S4E). *sufABCDSE* encodes components of the  
444 iron-sulfur cluster assembly machinery (92), which is required to synthesise and repair  
445 damaged iron-sulfur clusters under conditions of oxidative stress or iron limitation,  
446 and is therefore critical for *D. dadantii* virulence (91). In contrast, *ldtC* (previously *ycfS*),  
447 encodes a L,D-transpeptidase crucial for bacterial envelope assembly, by catalysing  
448 the attachment of the major outer-membrane protein Lpp to peptidoglycan (93). Ac-  
449 cording to our findings above, *sufABCDSE* and *ldtC* can be transcribed together, with  
450 an internal TTS and TSS located between them. *In planta*, the seven genes are indeed  
451 strongly co-expressed, with a slight decrease for *ldtC*, in full agreement with the iden-  
452 tified transcriptional map (Supplementary Fig S4E). It is conceivable that these genes  
453 are required under a common set of conditions encountered during plant infection,  
454 which was favoured by their inclusion in the same transcript, while the presence of al-  
455 ternative TSS and TTS might still allow separate expression when required. Indeed, the  
456 *sufABCDSE* operon is controlled by three transcriptional regulators, Fur, OxyR and IscR,  
457 which respectively sense iron limitation, oxidative stress and intracellular iron-sulfur  
458 cluster status (94). Each of them contributes to the activation of the *suf* promoter by  
459 oxidative stress occurring during plant penetration and colonisation (25): the repres-  
460 sor Fur is inactivated by reactive oxygen species (ROS); the activator OxyR becomes  
461 active through the oxidation of two cysteine residues and the formation of a disulfide  
462 bond; IscR becomes an activator of *suf* promoter after destruction of its iron-sulfur  
463 cluster by ROS (94). On the other hand, the activity of L,D-transpeptidases involves a  
464 catalytic cysteine residue that must be reduced (95), which is challenging under oxida-  
465 tive stress. The expression of *ldtC* from the *suf* promoter, which is strongly activated  
466 in the latter condition, is therefore biologically meaningful. Interestingly, in *E. coli*, the  
467 *suf* operon is also located upstream of a gene encoding a L,D-transpeptidase (*ldtA*),  
468 the two operons being also transcribed both together and separately (54).

469 **Concluding statement** In this study, we combined five transcriptomic datasets  
470 yielding complementary information and designed to provide a catalogue of genes' re-  
471 sponses and RNA landscapes to various growth and stress conditions, including one  
472 of the first applications of Nanopore native RNA-seq to prokaryotic transcriptomes.



Forquet et al.

473 Their integration through a computational method developed for this study allowed  
474 us to precisely determine and annotate the transcriptomic map of *D. dadantii*, the first  
475 of its kind in the *Dickeya* genus. The analysis of *in planta* DNA microarray data suggests  
476 that the identified TUs are also co-expressed during the early stages of plant infection,  
477 although a more refined *in planta* analysis would require higher-resolution transcrip-  
478 tomic data. Beyond its practical aspect as a community resource to help the scientific  
479 community to unravel gene regulation, including the virulence programme of this and  
480 related species, the obtained transcriptional map clearly indicates, after others, that  
481 the canonical operon model is insufficient to account for the complexity of bacterial  
482 transcription. The ability of the cell to differentially express genes of the same operon  
483 depending on metabolic needs and environmental conditions was first described with  
484 suboperonic regulation years ago. Later, with the emergence of next-generation se-  
485 quencing, transcriptomic analyses confirmed at the genomic scale that most operons  
486 were able to generate alternative transcripts of variable gene composition. Transcrip-  
487 tional read-through at terminators is another mechanism that might play a basal coordi-  
488 nation and regulation role, and explain the extent of transcription beyond the scale  
489 of operons. Recent findings include noncontiguous operons and excludons, where  
490 the expression of an operon transcript can be mutually regulated with that of a gene  
491 located on the opposite strand at the same locus. For such features, the putative cat-  
492 alogue provided here may be used as a starting point for further investigation, and in  
493 particular, might be combined with the *D. dadantii* non-coding RNA landscape (96) for  
494 a comprehensive analysis of transcriptional regulation in this bacterium. Altogether,  
495 our findings provide insights into the mechanisms of basal coordination of transcrip-  
496 tion and might contribute to the revision of the canonical view of operon structure  
497 and transcription organisation.

## 498 MATERIALS AND METHODS

499 **Bacterial strain, genome annotation and genome-wide predictions of oper-**  
500 **ons.** The genome sequence and annotation files from *Dickeya dadantii* strain 3937  
501 were obtained from NCBI under accession NC\_014500.1 (97). This work focused on  
502 coding genes only (CDS, representing 4211 genes over 4411 in total). *D. dadantii* oper-  
503 ons were predicted using Rockhopper, a recent computational tool for operon predic-  
504 tion based on RNA-seq expression data as well as genomic and functional informa-  
505 tion (40), by providing dataset 1 as input.

506 **RNA-sequencing data (dataset 1), definition of putative transcription units**  
507 **based on intergenic signals, and identification of unannotated genes.** Strand-specific,  
508 paired-end RNA-seq processed data used in this study are described in (98). Transcrip-  
509 tomes were obtained in 6 conditions (with two biological replicates each) including var-  
510 ious growth (M63 medium supplemented with sucrose, in exponential or stationary  
511 phase, in presence or absence of PGA) and DNA supercoiling conditions (novobiocin  
512 shock). For each sample, RNA fragments were inferred from paired-end reads infor-  
513 mation, and genome-wide coverage was computed from resulting RNA fragments co-  
514 ordinates using a Python home-made script.

515 To define putative transcription units, separately for each strand, adjacent genes  
516 were fused in the same putative TU as long as the coverage was greater than 0 at each  
517 position of their intergenic region (independently of its size) for at least half of the  
518 samples (Fig. 6A).

519 Unannotated genes were defined as DNA regions outside of known coding se-  
520 quences, longer than the first centile (1%) of *D. dadantii* gene lengths (192 bp), with an  
521 average coverage significantly different from 0 (with 99% confidence, *i.e.*, > 9 at each



**In vitro DNA microarray data (dataset 2) and co-expression validation of the putative transcription units using hierarchical clustering.** Microarray processed data used in this study are described elsewhere (27). They comprise 32 *in vitro* conditions (with two biological replicates each) including various growth and stress conditions encountered by *D. dadantii* during plant infection: cells were harvested in M63 (minimal) medium supplemented with sucrose, in exponential or stationary phase, in presence or in absence of PGA or leaf extract, and exposed or not to environmental perturbations (acidic, osmotic and oxidative stress). Pearson's correlation coefficients were computed among all gene pairs over all conditions on the logarithm of the normalised expression level (derived from probes intensity). For each putative TU, adjacent genes were grouped into clusters based on this correlation, using a hierarchical clustering framework constrained to group adjacent genes only, with a custom Python script. At each iteration of the algorithm, the median of cross-correlations among all clusters (or genes) was computed, and the adjacent clusters with maximal median were fused. The hierarchical clustering ends when a cutoff value  $C$  for the correlation is reached (Fig. 6B). If the agglomeration of all genes of the TU is achieved without reaching  $C$ , the TU is validated. Otherwise, the final clusters are considered as separate TUs. A high  $C$  value results in short highly correlated TUs, whereas a low  $C$  value yields longer moderately correlated TUs (Supplementary Tab. S5). We defined the value  $C = 0.25$  such that 20% of operon predictions were discarded (Supplementary Fig. S5), since it is the number of false predictions (*i.e.* specificity) evaluated for Rockhopper in *E. coli*, a *D. dadantii* enterobacterium relative. Varying the precise value of  $C$  did not qualitatively change the main results (Supplementary Tab. S5). The identified TUs exhibit a similar length distribution as those reported in *E. coli* (9, 3).

**Nanopore native RNA sequencing (dataset 3), validation of the mRNA landscape, and genome-wide identification of putative transcription termination sites.**

*D. dadantii* cultures were grown in M63 medium supplemented with 0.2% glucose and 0.2% PGA, until the early exponential phase ( $A_{600nm} = 0.2$ , condition 1), or the early stationary phase ( $A_{600nm} = 1.8$ , condition 2). RNAs were extracted using a frozen acid-phenol method, as previously described (100), and treated successively with Roche and Biolabs DNases. Two samples were prepared: 50  $\mu$ g of RNAs from each condition were pulled into one sample (sample 1), whereas the other one contained 100  $\mu$ g of RNAs from condition 2 (sample 2). Both samples were then supplied to Vertis Biotechnologie AG for Nanopore native RNA-seq: total RNA preparations were first examined by capillary electrophoresis, and ribosomal RNA molecules were depleted for sample 1 only using an in-house developed protocol (recovery rate = 84%). RNA 3'ends were then poly(A)-tailed using poly(A) polymerase, and the Direct RNA sequencing kit (SQK-RNA002) was used to prepare the library for 1D sequencing on the Oxford Nanopore sequencing device. The direct RNA libraries were sequenced on a MinION device (MIN-101B) using standard settings. Basecalling of the fast5 files was performed using Guppy (version 3.6.1) with the following settings: `-flowcell FLO-MIN106 -kit SQK-RNA002 -cpu_threads_per_caller 12 -compress_fastq -reverse_sequence true -trim_strategy rna`. Reads smaller than 50 nt were removed. 466 393 and 556 850 reads were generated from sample 1 and 2, respectively. Raw read sequencing data are available in the EBI Gene Expression (ArrayExpress) database under accession E-MTAB-10482. Quality control was performed on both datasets using Nanopack (101). Long-reads from the fastq files were mapped to *Dickeya dadantii* strain 3937 genome (NCBI accession number: NC\_014500.1) (97) using minimap2 (release minimap2-2.17 (r941)) (102). Output alignments in PAF and SAM format were generated with the recommended options for noisy Nanopore native RNA-seq, adapted to bacteria (no splic-

Mapping of *Dickeya dadantii* transcriptional landscape

ing) (-ax map-ont -k14). Secondary alignments were not reported for sample 2 due to multiple secondary alignments in ribosomal RNAs regions (-secondary=no). In total, 382 290 and 392 743 alignments were generated (77 and 67% mappability) from sample 1 and 2, respectively. Alignment files were further sorted, indexed and analysed with SAMtools. Alignments from both samples were merged into one PAF file, and the latter was used for further analyses.

For each TU previously defined with datasets 1 and 2 (Fig. 6A and 6B), the presence of long overlapping native RNA reads was investigated using a Python home-made script for adjacent gene pairs belonging to the same TU (Fig. 6C). If at least one RNA read overlapped the two adjacent genes, their co-transcription was validated (quoted "validated" in Supplementary Tab. S1A). If the signal was too weak for the investigated genes (read counts <9, not significantly different from 0 with 99% confidence), no conclusion could be drawn (quoted "weak signal" in Supplementary Tab. S1A). Otherwise, if no overlapping RNA was found, it was not validated (quoted "invalidated" in Supplementary Tab. S1A), which might also be due to the low number of conditions tested.

For the determination of TTSs, for each position of the genome, we computed the total number of RNA fragments ending at this particular position, using a Python home-made script. From this stop density, we defined putative TTSs as positions downstream of gene stop codons (up to 100 bp, based on 3'UTR lengths in *E. coli*) enriched for RNA fragments stops, respectively. In each of these regions, we started from site  $i$  with highest stop signal  $k_i$  on 5-bp centred windows (due to the low sequencing depth). For the position  $i$  to be considered as a putative TTS, we imposed  $k_i$  to be significantly different from 0 (with 95% confidence, > 6). TTSs obtained with this approach are provided in Supplementary Tab. S2D.

**Differential RNA-sequencing experiments and genome-wide identification of putative transcription start sites (dataset 4).** RNAs from dataset 2 (27) (*in vitro* DNA microarray data) were pooled into four samples S1 to S4, resulting in a combination of stress ( $pH$ ,  $NaCl$ ,  $H_2O_2$ ) and growth conditions: exponential phase with (S1) or without (S2) stress, transition to stationary phase with (S3) or without (S4) stress. Those samples were then supplied to Vertis Biotechnologie AG for TEX treatment and Illumina sequencing. Briefly, ribosomal RNA molecules were depleted from the total RNA samples using the Ribo-Zero rRNA Removal Kit for bacteria (Epicentre), and small RNAs (< 200 nt) were discarded using the RNeasy MinElute Cleanup Kit (Qiagen). For the generation of TSS cDNA libraries, the samples were first fragmented using RNase III, poly(A)-tailed using poly(A) polymerase, split into two halves, with one half being treated with Terminator exonuclease (+TEX, Epicentre), while the other one was left untreated (-TEX). 5'PPP structures were then converted into 5'P ends using RNA 5' Polyphosphatase (5'PP, Epicentre), to which RNA adapters were ligated. First-strand cDNAs were synthesised using an oligo(dT)-adapter primer and the M-MLV reverse transcriptase, PCR-amplified using a high fidelity DNA polymerase, purified using the Agencourt AMPure XP kit (Beckman Coulter Genomics), and sequenced on an Illumina NextSeq 500 system (60 bp read length, single-end, strand-specific protocol). Sequencing reads were trimmed to remove poly(A) tails and adapters. The fastq sequencing files are available in the EBI Gene Expression (ArrayExpress) database under accession E-MTAB-9075. Putative TSS positions were then determined based on the enrichment of sequencing reads in TEX-treated samples (+TEX) compared to non-treated ones (-TEX) using TSSer, an automated annotation programme from dRNA-seq data with default parameters: TSS positions within 5 bases on the same strand were clustered together and the position with the highest amount of read increase in the +TEX library was retained. TSSs obtained with such approach are provided in Supplemen-

Forquet et al.

625 tary Tab. S2A.

626 **In planta DNA microarray data (dataset 5) and co-expression validation of the**  
627 **transcription units inferred from *in vitro* conditions.** Microarray processed data  
628 used in this study are described in (29). They comprise two conditions: bacteria were  
629 collected 6 hours post-inoculation of the model plant *Arabidopsis thaliana* by wild-type  
630 *D. dadantii* during the epiphytic colonisation of the leaf surfaces (5 replicates), and 24  
631 hours post-inoculation during the leaf invasion (4 replicates). Pearson's correlation co-  
632 efficient was computed among all gene pairs over the two conditions on the logarithm  
633 of the normalised expression level (derived from probes intensity) (Supplementary  
634 Fig. S4).

635 **Genome-wide detection of transcription start and termination sites from**  
636 **RNA-seq data, mapping to the transcription units.** We computed the densities of  
637 RNA fragments starting and ending at each position of the genome, across all RNA-seq  
638 samples (dataset 1) (Fig. 6D). In order to retain only TSSs and TTSs relevant to protein-  
639 coding genes, we focused on regions located upstream of gene start codons (up to 250  
640 bp, based on 5'UTR lengths in *E. coli*), and downstream of gene stop codons (up to 100  
641 bp, based on 3'UTR lengths in *E. coli*), respectively. In each of these regions, putative  
642 TSSs/TTSs were defined as sites  $i$  with highest start/stop signal  $k_i$ . To differentiate a  
643 TSS/TTS at position  $i$  from the noise, we imposed two successive conditions: (i)  $k_i$  is  
644 significantly different from 0 (with 99% confidence,  $k_i > 9$ ); (ii)  $k_i$  is greater or equal  
645 than a density cutoff value  $D$ . The latter was set as ten times the median of the den-  
646 sity values of the region investigated for TSSs, and five times for TTSs, showing that  
647 the recorded transcripts indeed start/stop at that precise position, rather than along a  
648 poorly defined starting/stopping region. In that case, the position  $i$  was considered as  
649 a putative TSS/TTS, of strength  $k_i$ . Setting a low density cutoff  $D$  would tend to include  
650 false positives resulting from RNA-seq signal variations (noise), whereas a high cutoff  
651 would exclude weakly expressed TSSs/TTSs. We selected the value of  $D$  (i) such that  
652 TSSs and TTSs were detected for known operons and experimentally characterised  
653 TUs (described in the manuscript) and (ii) by visually curating the density graphs and  
654 excluding many positions obviously associated to RNA-Seq signal variations.

655 TSSs/TTSs positions were then compared among datasets to evaluate their con-  
656 fidence level. For each TSS identified with this approach, if a putative TSS obtained  
657 from dataset 4 (TEX libraries) was close enough ( $\pm 20bp$ ), its position was retained (as-  
658 suming a higher precision and resolution). In addition, a scan for promoter motifs  
659 was conducted with bTSSfinder (52). For TTSs, the same method was applied using  
660 the position of the closest predicted hairpin loop ( $\pm 50$  bp), or TTS positions obtained  
661 from Nanopore native RNA-seq data (dataset 3). TSSs and TSSs were then assigned to  
662 the TUs, and only internal TSSs and TTSs with 15% relative amplitude (*i.e.*  $\frac{k_i}{\sum(k_i)}$ ) were  
663 retained, resulting in a total of 2595 TSSs and 1699 TTSs over all TUs. Setting a low rel-  
664 ative amplitude cutoff would tend to retain all TSSs / TTSs, including many very weak  
665 ones mostly due to noise. We selected the relative amplitude cutoff value (i) based on  
666 a collection of known operons and TUs (shown in the manuscript), and (ii) such that  
667 the total number of TSSs and TTSs identified was consistent with those reported re-  
668 cently in *E. coli* (3, 54). If no TSS/TTS was found from dataset 1, we indicated the closest  
669 putative one from dataset 3/4 with a lower confidence level. The lists are provided in  
670 Supplementary Tab. S1A to S1C.

671 **Detection of transcriptional readthrough at internal TTSs** For each internal  
672 TTS, the expression ratio  $\Delta(\log_2(RPKM))$  of the gene located downstream compared  
673 to the gene located upstream was computed across RNA-seq conditions. We imposed  
674 two successive conditions to consider the transcriptional read-through at this TTS as



## Mapping of *Dickeya dadantii* transcriptional landscape

675 condition-independent: (1)  $\Delta(\log_2(RPKM)) \leq -0.5$  for at least 8 samples over 12 cor-  
676 responding at least to a termination probability  $P(TTS) = 71\%$ , (2) standard error of  
677 the mean  $\sigma P(TTS) \leq 12.5\%$  corresponding to a relatively constant mean expression  
678 ratio and subsequent termination probability.

### Availability of data and materials.

- 680 • *Dickeya dadantii* strain 3937 genome sequence and annotation files: NCBI ac-  
681 cession number NC\_014500.1 (97).
- 682 • RNA-seq data (dataset 1): EBI Gene Expression (ArrayExpress) accession num-  
683 ber E-MTAB-7650 (98).
- 684 • *In vitro* microarray data (dataset 2): EBI Gene Expression (ArrayExpress) acces-  
685 sion number E-MTAB-541 (27).
- 686 • Nanopore native RNA sequencing (dataset 3): EBI Gene Expression (ArrayEx-  
687 press) accession number E-MTAB-10482. Note: not publicly available until the  
688 manuscript is accepted. Please use login details Username =  
689 Reviewer\_E-MTAB-10482, Password = gdrof3hg.
- 690 • Differential RNA-seq data (dataset 4): EBI Gene Expression (ArrayExpress) acces-  
691 sion number E-MTAB-9075. Note: not publicly available until the manuscript is  
692 accepted. Please use login details Username = Reviewer\_E-MTAB-9075, Pass-  
693 word = jenuxmon.
- 694 • *In planta* microarray data (dataset 5): NCBI Gene Expression Omnibus (GEO)  
695 accession number GSE94713 (29).

## 696 SUPPLEMENTAL MATERIAL

697 **SUPPLEMENTARY FIGURE S1.** (A) Co-expression validation of *znuCBA* TU with *in vitro*  
698 DNA microarray data (dataset 2): the three genes exhibit strong internal cross-correlations  
699 clearly indicative of an operon. (B) Same for *sapABCDffabl* TU: the six genes are co-  
700 expressed, with a reduced correlation of *fabI* due to the presence of a strong inter-  
701 nal TSS (Fig. 3B). (C) Same for *rhIb-gppA-pehV* TU: the three genes are co-expressed,  
702 with a reduced transcriptional level of *pehV* (Fig. 4A) and a reduced correlation due to  
703 condition-independent read-through at the *gppA* intrinsic terminator. (D) Effect of PGA  
704 on *pelCZ* TU: *pelC* and *pelZ* expression profiles are similar in absence (left) or presence  
705 (right) of PGA in stationary phase, in spite of a drastically different global expression  
706 level.

707 **SUPPLEMENTARY FIGURE S2.** Co-transcription and mRNA landscape validation  
708 with Nanopore native RNA-seq for (A) *rhIb-gppA-pehV* TU with condition-independent  
709 read-through at the intrinsic TTS downstream of *gppA*; (B) *pelD-paeY-pemA* TU with  
710 condition-dependent read-through downstream of *pelD* internal TTS; (C) *cytABCD* TU  
711 with condition-dependent read-through downstream of *cytA* internal TTS. Those in-  
712 ternal TTSs are occasionally overstepped, resulting in different transcripts isoforms  
713 (as shown in red) which are all detected as long native RNA reads (black). (D) *indCvf-*  
714 *mAZBCDFG* noncontiguous TU (black Nanopore reads on the negative strand), with  
715 *vfmE* being transcribed on the opposite strand (blue Nanopore reads on the positive  
716 strand), resulting in overlapping antisense transcripts.

717 **SUPPLEMENTARY FIGURE S3.** (A) Quantification of condition-dependent tran-  
718 scriptional read-through: example of the *cytABCD* TU. A putative Rho-independent TTS  
719 is identified downstream of *cytA* although not validated. Its probability of termination  
720 (inferred from the expression variation  $\Delta(\log_2(RPKM))$  of *cytA* compared to the other  
721 genes) is regulated and depends both on the growth phase and the presence of PGA  
722 ( $P(TTS_{cytA}) = 0.78 \pm 0.03$  vs  $0.51 \pm 0.03$ ) besides a global up-regulation of the whole TU.  
723 (B) The *greB* and *ompRenvZ* transcription units form a potential divergent excludon:

Forquet et al.

724 long 5'UTRs overlapping transcripts are generated by *ompR* and *greB* divergent genes  
725 and might form a dsRNA that could prevent each other transcription. In *E. coli*, *ompR*  
726 and *envZ* are part of the same operon (red), and *greB* is transcribed alone (blue). Such  
727 genomic region forming a dsRNA was also identified in *E. coli* (90).

728 **SUPPLEMENTARY FIGURE S4.** *In planta* DNA microarray data, 6 hours post-inoculation  
729 (hpi) of the plant *Arabidopsis thaliana* (epiphytic colonisation of the leaf surfaces, 5  
730 replicates), and 24 hpi (leaf invasion, 4 replicates). (A) Distribution of co-expression  
731 correlation coefficients among (blue) all genes and (red) genes belonging to the same  
732 TU. Among the 50% most correlated genes *in planta*, 80% belong to the same TUs, with  
733 the example TUs from the manuscript (*smtA-mukFEB*, *znuCBA*, *sapABCDF-fabI*, *glgBXCAP*,  
734 *pelCZ*, *rhlB-gppA-pehV*, *pelD-paeY-pemA*, *cytABCD*) displaying a median correlation of 0.9  
735 *in planta*. (B) Pearson's co-expression correlation coefficients of *cytABCD* TU with sur-  
736 rounding isodirectional (on the same strand) TUs. (C) Same for *pelCZ* TU. (D) Same  
737 for *pelD-paeY-pemA* TU. (E) Identification of *sufABCDE-ldtC* complex TU, composed of  
738 operons of apparently unrelated functions, exhibiting a strong internal TSS (51% to-  
739 tal magnitude) upstream of *ldtC* (previously *ycfS*) and a strong internal TTS (52% total  
740 magnitude) downstream *sufE*, allowing separate transcriptions. The seven genes are  
741 highly correlated *in planta*.

742 **SUPPLEMENTARY FIGURE S5.** Co-expression validation of transcription units for  
743 different correlation thresholds *C*. TUs obtained with high *C* values are more highly  
744 correlated but shorter. Putative TUs are obtained from step 1 of the analysis (inter-  
745 genic signal), without any requirement on the correlation of expression. With the cho-  
746 sen value ( $C = 0.25$ ), TUs group around three times more gene pairs than predicted  
747 operons by Rockhopper. The value of *C* was chosen such that 20% of operon predic-  
748 tions were discarded, since it is the number of false predictions of Rockhopper in *E.*  
749 *coli*, a *D. dadantii* enterobacterium relative.

750 **SUPPLEMENTARY TABLE S1.** (A) *Dickeya dadantii* transcription units defined by  
751 our approach. (B) TSSs across TUs. (C) TTSs across TUs. (D) Unannotated protein-  
752 coding genes.

753 **SUPPLEMENTARY TABLE S2.** (A) Putative TSSs identified by differential RNA-seq  
754 (TEX treatment) under a wide range of environmental conditions. (B) Genomic po-  
755 sition and secondary structure of putative TTSs: intrinsic terminators predicted by  
756 ARNold (Erpin and RNAmotif algorithms). (C) Genomic position of putative TTSs: Rho-  
757 dependent terminators predicted by RhoTermPredict. (D) Putative TTSs identified by  
758 Nanopore native RNA-seq.

759 **SUPPLEMENTARY TABLE S3.** TSS validation, based on all published TSSs to date  
760 and to our knowledge in *D.dadantii*.

761 **SUPPLEMENTARY TABLE S4.** (A) Catalogue of putative noncontiguous transcrip-  
762 tion units. (B) Catalogue of putative excludons.

763 **SUPPLEMENTARY TABLE S5.** Catalogue of transcription unit architecture. Puta-  
764 tive TUs are obtained from the first step of the approach (analysis of intergenic signal).  
765 Varying the precise value of the correlation threshold *C* for co-expression validation  
766 (step 2) does not change the results qualitatively. A larger *C* value results in shorter but  
767 more highly correlated TUs. Final TUs obtained with  $C = 0.25$  are longer than predicted  
768 operons and exhibit a similar length distribution as those reported in *E. coli* (9, 3).

## 769 ACKNOWLEDGEMENTS

770 We thank the whole CRP team for useful discussions as well as Ivan Junier.

## 771 FUNDING

772 R.F was funded by a research allocation from the French Research Ministry. This work  
773 also benefited from INSA Lyon grants [BQR 2016 to S.M.]; IXXI; Agence Nationale de  
774 la Recherche [ANR-18-CE45-0006-01 to S.M.], Breakthrough Phytobiome IDEX LYON  
775 project, Université de Lyon Programme d'investissements d'Avenir [ANR16-IDEX-0005  
776 to S.R.]; Centre National de la Recherche Scientifique [to S.R., F.H. W.N. and S.M.]; Uni-  
777 versité Claude Bernard Lyon 1 [to S.R., F.H. W.N. and S.M.].

## 778 CONFLICT OF INTEREST STATEMENT

779 None declared.

## 780 REFERENCES

1. **Jacob F, Monod J.** 1961. Genetic regulatory mechanisms in the synthesis of proteins. *J Mol Biol* 3:318–356. doi:10.1016/s0022-2836(61)80072-7.
2. **Nicolas P, Mäder U, Dervyn E, Rochat T, Leduc A, Pigeonneau N, Bidnenko E, Marchadier E, Hoebeke M, Aymerich S, Becher D, Bisicchia P, Botella E, Delumeau O, Doherty G, Denham EL, Fogg MJ, Fromion V, Goelzer A, Hansen A, Härtig E, Harwood CR, Homuth G, Jarmer H, Jules M, Klipp E, Le Chat L, Lecoite F, Lewis P, Liebermeister W, March A, Mars RAT, Nannapaneni P, Noone D, Pohl S, Rinn B, Rügheimer F, Sappa PK, Samson F, Schaffer M, Schwikowski B, Steil L, Stülke J, Wiegert T, Devine KM, Wilkinson AJ, van Dijk JM, Hecker M, Völker U, Bessières P, Noirot P.** Mar 2012. Condition-dependent transcriptome reveals high-level regulatory architecture in *Bacillus subtilis*. *Sci (New York, N.Y.)* 335 (6072):1103–1106. doi:10.1126/science.1206848.
3. **Yan B, Boitano M, Clark TA, Ettwiller L.** Sep 2018. SMRT-Cappable-seq reveals complex operon variants in bacteria. *Nat Commun* 9 (1):1–11. doi:10.1038/s41467-018-05997-6.
4. **Warrier I, Ram-Mohan N, Zhu Z, Hazery A, Echlin H, Rosch J, Meyer MM, Opijnen Tv.** Dec 2018. The Transcriptional landscape of *Streptococcus pneumoniae* TIGR4 reveals a complex operon architecture and abundant riboregulation critical for growth and virulence. *PLOS Pathog* 14 (12):e1007461. doi:10.1371/journal.ppat.1007461.
5. **Mejía-Almonte C, Busby SJW, Wade JT, van Helden J, Arkin AP, Stormo GD, Eilbeck K, Palsson BO, Galagan JE, Collado-Vides J.** Jul 2020. Redefining fundamental concepts of transcription initiation in bacteria. *Nat Rev Genet* p 1–16. doi:10.1038/s41576-020-0254-8.
6. **Adhya S.** Jun 2003. Suboperonic regulatory signals. *Sci STKE: signal transduction knowledge environment* 2003 (185):pe22. doi:10.1126/stke.2003.185.pe22.
7. **Kornblihtt AR, Schor IE, Alló M, Dujardin G, Petrillo E, Muñoz MJ.** Mar 2013. Alternative splicing: a pivotal step between eukaryotic transcription and translation. *Nat Rev Mol Cell Biol* 14 (3):153–165. doi:10.1038/nrm3525.
8. **Junier I, Rivoire O.** 2016. Conserved Units of Co-Expression in Bacterial Genomes: An Evolutionary Insight into Transcriptional Regulation. *PLOS One* 11 (5):e0155740. doi:10.1371/journal.pone.0155740.
9. **Conway T, Creecy JP, Maddox SM, Grissom JE, Conkle TL, Shadid TM, Teramoto J, San Miguel P, Shimada T, Ishihama A, Mori H, Wanner BL.** 2014. Unprecedented high-resolution view of bacterial operon architecture revealed by RNA sequencing. *mBio* 5 (4):01442–01414. doi:10.1128/mBio.01442-14.
10. **Kröger C, Dillon SC, Cameron ADS, Papenfort K, Sivasankaran SK, Hokamp K, Chao Y, Sittka A, Hébrard M, Händler K, Colgan A, Leekitcharoenphon P, Langridge GC, Lohan AJ, Loftus B, Lucchini S, Ussery DW, Dorman CJ, Thomson NR, Vogel J, Hinton JCD.** May 2012. The transcriptional landscape and small RNAs of *Salmonella enterica* serovar Typhimurium. *Proc Natl Acad Sci United States Am* 109 (20):E1277–1286. doi:10.1073/pnas.1201061109.
11. **Dugar G, Herbig A, Förstner KU, Heidrich N, Reinhardt R, Nieselt K, Sharma CM.** May 2013. High-resolution transcriptome maps reveal strain-specific regulatory features of multiple *Campylobacter jejuni* isolates. *PLOS genetics* 9 (5):e1003495. doi:10.1371/journal.pgen.1003495.
12. **Wang Y, Li X, Mao Y, Blaschek HP.** Sep 2011. Single-nucleotide resolution analysis of the transcriptome structure of *Clostridium beijerinckii* NCIMB 8052 using RNA-Seq. *BMC Genom* 12:479. doi:10.1186/1471-2164-12-479.
13. **Uplekar S, Rougemont J, Cole ST, Sala C.** Jan 2013. High-resolution transcriptome and genome-wide dynamics of RNA polymerase and NusA in *Mycobacterium tuberculosis*. *Nucleic Acids Res* 41 (2):961–977. doi:10.1093/nar/gks1260.
14. **Güell M, van Noort V, Yus E, Chen WH, Leigh-Bell J, Michalodimitrakis K, Yamada T, Arumugam M, Doerks T, Kühner S, Rode M, Suyama M, Schmidt S, Gavin AC, Bork P, Serrano L.** Nov 2009. Transcriptome complexity in a genome-reduced bacterium. *Sci (New York, N.Y.)* 326 (5957):1268–1271. doi:10.1126/science.1176951.
15. **Schmidtke C, Findeiss S, Sharma CM, Kuhfuss J, Hoffmann S, Vogel J, Stadler PF, Bonas U.** Mar 2012. Genome-wide transcriptome analysis of the plant pathogen *Xanthomonas* identifies sRNAs with putative virulence functions. *Nucleic Acids Res* 40 (5):2020–2031. doi:10.1093/nar/gkr904.
16. **Alkhateeb RS, Vorhöfter FJ, Rückert C, Mentz A, Wibberg D, Hublik G, Niehaus K, Pühler A.** May 2016. Genome wide transcription start sites analysis of *Xanthomonas campestris* pv. *campestris* B100 with insights into the gum gene cluster directing the biosynthesis of the exopolysaccharide xanthan. *J Biotechnol* 225:18–28. doi:10.1016/j.jbiotec.2016.03.020.
17. **Hugouvieux-Cotte-Pattat N, Condemine G, Gueguen E, Shevchik VE.** 2020. *Dickeya* Plant Pathogens, p 1–10. *In* eLS. American Cancer Society. doi:10.1002/9780470015902.a0028932.
18. **Fujikawa T, Ota N, Sasaki M, Nakamura T, Iwanami T.** Jul 2019. Emergence of apple bacterial quick decline caused by *Dickeya dadantii* in Japan. *J Gen Plant Pathol* 85 (4):314–319. doi:10.1007/s10327-019-00852-y.
19. **Toth IK, Wolf JMvd, Saddler G, Lojkowska E, Hélias V, Pirhonen M, Tsrör (Lahkim) L, Elphinstone JG.** 2011. *Dickeya* species: an emerging problem for potato production in Europe. *Plant Pathol* 60 (3):385–399. doi:10.1111/j.1365-3059.2011.02427.x.
20. **Jiang HH, Hao JJ, Johnson SB, Brueggeman RS, Secor G.** Jul 2016. First Report of *Dickeya dianthicola* Causing Blackleg and Bacterial Soft Rot on Potato in Maine. *Plant Dis* 100 (11):2320–2320. doi:

Forquet et al.

- 10.1094/PDIS-12-15-1513-PDN.
21. **Pu XM, Zhou JN, Lin BR, Shen HF.** Dec 2012. First Report of Bacterial Foot Rot of Rice Caused by a *Dickeya zeae* in China. *Plant Dis* 96 (12):1818. doi:[10.1094/PDIS-03-12-0315-PDN](https://doi.org/10.1094/PDIS-03-12-0315-PDN).
  22. **Ma B, Hibbing ME, Kim HS, Reedy RM, Yedidia I, Breuer J, Breuer J, Glasner JD, Perna NT, Kelman A, Charkowski AO.** Sep 2007. Host range and molecular phylogenies of the soft rot enterobacterial genera *Pectobacterium* and *Dickeya*. *Phytopathology* 97 (9):1150–1163. doi:[10.1094/PHTO-97-9-1150](https://doi.org/10.1094/PHTO-97-9-1150).
  23. **Reverchon S, Muskhelishvili G, Nasser W.** 2016. Virulence Program of a Bacterial Plant Pathogen: The *Dickeya* Model. *Prog Mol Biol Transl Sci* 142:51–92. doi:[10.1016/bs.pmbts.2016.05.005](https://doi.org/10.1016/bs.pmbts.2016.05.005).
  24. **Grignon C, Sentenac H.** 1991. pH and Ionic Conditions in the Apoplast. *Annu Rev Plant Physiol Plant Mol Biol* 42 (1):103–128. doi:[10.1146/annurev.pp.42.060191.000535](https://doi.org/10.1146/annurev.pp.42.060191.000535).
  25. **Lamb C, Dixon RA.** 1997. The Oxidative Burst in Plant Disease Resistance. *Annu Rev Plant Physiol Plant Mol Biol* 48 (1):251–275. doi:[10.1146/annurev.arplant.48.1.251](https://doi.org/10.1146/annurev.arplant.48.1.251).
  26. **Lebeau A, Reverchon S, Gaubert S, Kraepiel Y, Simond-Côte E, Nasser W, Van Gijsegem F.** Mar 2008. The GacA global regulator is required for the appropriate expression of *Erwinia chrysanthemi* 3937 pathogenicity genes during plant infection. *Environ Microbiol* 10 (3):545–559. doi:[10.1111/j.1462-2920.2007.01473.x](https://doi.org/10.1111/j.1462-2920.2007.01473.x).
  27. **Jiang X, Sobetzko P, Nasser W, Reverchon S, Muskhelishvili G.** Apr 2015. Chromosomal “Stress-Response” Domains Govern the Spatiotemporal Expression of the Bacterial Virulence Program. *mBio* 6 (3). doi:[10.1128/mBio.00353-15](https://doi.org/10.1128/mBio.00353-15).
  28. **Jiang X, Zghidi-Abouzid O, Oger-Desfeux C, Hommais F, Greliche N, Muskhelishvili G, Nasser W, Reverchon S.** 2016. Global transcriptional response of *Dickeya dadantii* to environmental stimuli relevant to the plant infection. *Environ Microbiol* 18 (11):3651–3672. doi:[10.1111/1462-2920.13267](https://doi.org/10.1111/1462-2920.13267).
  29. **Pédrón J, Chapelle E, Alunni B, Van Gijsegem F.** 2018. Transcriptome analysis of the *Dickeya dadantii* PecS regulon during the early stages of interaction with *Arabidopsis thaliana*. *Mol Plant Pathol* 19 (3):647–663. doi:[10.1111/mpp.12549](https://doi.org/10.1111/mpp.12549).
  30. **Duprey A, Taib N, Leonard S, Garin T, Flandrois JP, Nasser W, Brochier-Armanet C, Reverchon S.** 2019. The phytopathogenic nature of *Dickeya aquatica* 174/2 and the dynamic early evolution of *Dickeya* pathogenicity. *Environ Microbiol* 21 (8):2809–2835. doi:[10.1111/1462-2920.14627](https://doi.org/10.1111/1462-2920.14627).
  31. **Nasser W, Condemine G, Plantier R, Anker D, Robert-Baudouy J.** Jun 1991. Inducing properties of analogs of 2-keto-3-deoxygluconate on the expression of pectinase genes of *Erwinia chrysanthemi*. *FEMS Microbiol Lett* 81 (1):73–78. doi:[10.1111/j.1574-6968.1991.tb04715.x](https://doi.org/10.1111/j.1574-6968.1991.tb04715.x).
  32. **Ouafa ZA, Reverchon S, Lautier T, Muskhelishvili G, Nasser W.** 2012. The nucleoid-associated proteins H-NS and FIS modulate the DNA supercoiling response of the *pel* genes, the major virulence factors in the plant pathogen bacterium *Dickeya dadantii*. *Nucleic Acids Res* 40 (10):4306–4319. doi:[10.1093/nar/gks014](https://doi.org/10.1093/nar/gks014).
  33. **Depledge DP, Srinivas KP, Sadaoka T, Bready D, Mori Y, Placantonakis DG, Mohr I, Wilson AC.** Feb 2019. Direct RNA sequencing on nanopore arrays redefines the transcriptional complexity of a viral pathogen. *Nat Commun* 10 (1):754. doi:[10.1038/s41467-019-08734-9](https://doi.org/10.1038/s41467-019-08734-9).
  34. **Jenjaroenpun P, Wongsurawat T, Pereira R, Patumcharoenpol P, Ussery DW, Nielsen J, Nookaew I.** Apr 2018. Complete genomic and transcriptional landscape analysis using third-generation sequencing: a case study of *Saccharomyces cerevisiae* CEN.PK113-7D. *Nucleic Acids Res* 46 (7):e38. doi:[10.1093/nar/gky014](https://doi.org/10.1093/nar/gky014).
  35. **Parker MT, Knop K, Sherwood AV, Schurch NJ, Mackinnon K, Gould PD, Hall AJ, Barton GJ, Simpson GG.** Jan 2020. Nanopore direct RNA sequencing maps the complexity of *Arabidopsis* mRNA processing and m6A modification. *eLife* 9:e49658. doi:[10.7554/eLife.49658](https://doi.org/10.7554/eLife.49658).
  36. **Workman RE, Tang AD, Tang PS, Jain M, Tyson JR, Razaghi R, Zuzarte PC, Gilpatrick T, Payne A, Quick J, Sadowski N, Holmes N, de Jesus JG, Jones KL, Soulette CM, Snutch TP, Loman N, Paten B, Loose M, Simpson JT, Olsen HE, Brooks AN, Akeson M, Timp W.** Dec 2019. Nanopore native RNA sequencing of a human poly(A) transcriptome. *Nat Methods* 16 (12):1297–1305. doi:[10.1038/s41592-019-0617-2](https://doi.org/10.1038/s41592-019-0617-2).
  37. **Pitt ME, Nguyen SH, Duarte TPS, Teng H, Blaskovich MAT, Cooper MA, Coin LJM.** Feb 2020. Evaluating the genome and resistome of extensively drug-resistant *Klebsiella pneumoniae* using native DNA and RNA Nanopore sequencing. *GigaScience* 9 (giaa002). doi:[10.1093/gigascience/giaa002](https://doi.org/10.1093/gigascience/giaa002).
  38. **Sharma CM, Vogel J.** Jun 2014. Differential RNA-seq: the approach behind and the biological insight gained. *Curr Opin Microbiol* 19:97–105. doi:[10.1016/j.mib.2014.06.010](https://doi.org/10.1016/j.mib.2014.06.010).
  39. **Oyelade J, Isewon I, Oladipupo F, Aromolaran O, Uwoghiren E, Ameh F, Achas M, Adebisi E.** Nov 2016. Clustering Algorithms: Their Application to Gene Expression Data. *Bioinform Biol Insights* 10:237–253. doi:[10.4137/BBI.S38316](https://doi.org/10.4137/BBI.S38316).
  40. **Tjaden B.** Apr 2019. A computational system for identifying operons based on RNA-seq data. *Methods* doi:[10.1016/j.ymeth.2019.03.026](https://doi.org/10.1016/j.ymeth.2019.03.026).
  41. **Yamanaka K, Ogura T, Niki H, Hiraga S.** Nov 1995. Characterization of the *smtA* gene encoding an S-adenosylmethionine-dependent methyltransferase of *Escherichia coli*. *FEMS microbiology letters* 133 (1-2):59–63. doi:[10.1111/j.1574-6968.1995.tb07861.x](https://doi.org/10.1111/j.1574-6968.1995.tb07861.x).
  42. **López-Solanilla E, García-Olmedo F, Rodríguez-Palenzuela P.** Jun 1998. Inactivation of the *sapA* to *sapF* locus of *Erwinia chrysanthemi* reveals common features in plant and animal bacterial pathogenesis. *The Plant Cell* 10 (6):917–924. doi:[10.1105/tpc.10.6.917](https://doi.org/10.1105/tpc.10.6.917).
  43. **Cronan JE, Thomas J.** 2009. Bacterial Fatty Acid Synthesis and its Relationships with Polyketide Synthetic Pathways. *Methods enzymology* 459:395–433. doi:[10.1016/S0076-6879\(09\)04617-5](https://doi.org/10.1016/S0076-6879(09)04617-5).
  44. **Bergler H, Fuchsbichler S, Högenauer G, Turnowsky F.** Dec 1996. The enoyl-[acyl-carrier-protein] reductase (FabI) of *Escherichia coli*, which catalyzes a key regulatory step in fatty acid biosynthesis, accepts NADH and NADPH as cofactors and is inhibited by palmitoyl-CoA. *Eur J Biochem* 242 (3):689–694. doi:[10.1111/j.1432-1033.1996.0689r.x](https://doi.org/10.1111/j.1432-1033.1996.0689r.x).
  45. **Preiss J.** Aug 2009. Glycogen: Biosynthesis and Regulation. *EcoSal Plus* 3 (2). doi:[10.1128/ecosalplus.4.7.4](https://doi.org/10.1128/ecosalplus.4.7.4).
  46. **Montero M, Almagro G, Eydallin G, Viale AM, Muñoz FJ, Bahaji A, Li J, Rahimpour M, Baroja-Fernández E, Pozueta-Romero J.** Jan 2011. *Escherichia coli* glycogen genes are organized in a single *glgBXCAP* transcriptional unit possessing an alternative suboperonic promoter within *glgC* that directs *glgAP* expression. *The Biochem J* 433 (1):107–117. doi:[10.1042/BJ20101186](https://doi.org/10.1042/BJ20101186).
  47. **Patzer SI, Hantke K.** Aug 2000. The zinc-responsive regulator Zur and its control of the *znu* gene cluster encoding the ZnuABC zinc uptake system in *Escherichia coli*. *The J Biol Chem* 275 (32):24321–24332. doi:[10.1074/jbc.M001775200](https://doi.org/10.1074/jbc.M001775200).
  48. **Jorjani H, Zavolan M.** Apr 2014. TSSer: an automated method to identify transcription start sites in prokaryotic genomes from differential RNA sequencing data. *Bioinform (Oxford, England)* 30 (7):971–974. doi:[10.1093/bioinformatics/btt752](https://doi.org/10.1093/bioinformatics/btt752).
  49. **Ray-Soni A, Bellecourt MJ, Landick R.** 2016. Mechanisms of Bacterial Transcription Termination: All Good Things Must End. *Annu Rev Biochem* 85 (1):319–347. doi:[10.1146/annurev-biochem-060815-](https://doi.org/10.1146/annurev-biochem-060815-)



Mapping of *Dickeya dadantii* transcriptional landscape

- 014844.
50. **Naville M, Ghuillot-Gaudeffroy A, Marchais A, Gautheret D.** Feb 2011. ARNold: a web tool for the prediction of Rho-independent transcription terminators. *RNA biology* 8 (1):11–13. doi: [10.4161/rna.8.1.13346](https://doi.org/10.4161/rna.8.1.13346).
  51. **Di Salvo M, Puccio S, Peano C, Lacour S, Alifano P.** Mar 2019. RhoTermPredict: an algorithm for predicting Rho-dependent transcription terminators based on Escherichia coli, Bacillus subtilis and Salmonella enterica databases. *BMC Bioinform* 20 (1):117. doi: [10.1186/s12859-019-2704-x](https://doi.org/10.1186/s12859-019-2704-x).
  52. **Shahmuradov IA, Mohamad Razali R, Bougouffa S, Radovanovic A, Bajic VB.** Feb 2017. bTSSfinder: a novel tool for the prediction of promoters in cyanobacteria and Escherichia coli. *Bioinformatics* 33 (3):334–340. doi: [10.1093/bioinformatics/btw629](https://doi.org/10.1093/bioinformatics/btw629).
  53. **Silva SdAe, Echeverrigaray S.** Nov 2012. Bacterial Promoter Features Description and Their Application on E. coli in silico Prediction and Recognition Approaches. *Bioinformatics* doi: [10.5772/48149](https://doi.org/10.5772/48149).
  54. **Ju X, Li D, Liu S.** Nov 2019. Full-length RNA profiling reveals pervasive bidirectional transcription terminators in bacteria. *Nat Microbiol* 4 (11):1907–1918. doi: [10.1038/s41564-019-0500-z](https://doi.org/10.1038/s41564-019-0500-z).
  55. **Pissavin C, Robert-Baudouy J, Hugouvieux-Cotte-Pattat N.** Dec 1996. Regulation of pelZ, a gene of the pelB-pelC cluster encoding a new pectate lyase of Erwinia chrysanthemi 3937. *J Bacteriol* 178 (24):7187–7196. doi: [10.1128/jb.178.24.7187-7196.1996](https://doi.org/10.1128/jb.178.24.7187-7196.1996).
  56. **Garibaldi A, Bateman DF.** Jan 1971. Pectic enzymes produced by Erwinia chrysanthemi and their effects on plant tissue. *Physiol Plant Pathol* 1 (1):25–40. doi: [10.1016/0048-4059\(71\)90037-3](https://doi.org/10.1016/0048-4059(71)90037-3).
  57. **Gusarov I, Nudler E.** Nov 2001. Control of Intrinsic Transcription Termination by N and NusA: The Basic Mechanisms. *Cell* 107 (4):437–449. doi: [10.1016/S0092-8674\(01\)00582-7](https://doi.org/10.1016/S0092-8674(01)00582-7).
  58. **Morita T, Ueda M, Kubo K, Aiba H.** Aug 2015. Insights into transcription termination of Hfq-binding sRNAs of Escherichia coli and characterization of readthrough products. *RNA* 21 (8):1490–1501. doi: [10.1261/rna.051870.115](https://doi.org/10.1261/rna.051870.115).
  59. **Stringer AM, Currenti S, Bonocora RP, Baranowski C, Petrone BL, Palumbo MJ, Reilly AA, Zhang Z, Erill I, Wade JT.** Feb 2014. Genome-Scale Analyses of Escherichia coli and Salmonella enterica AraC Reveal Noncanonical Targets and an Expanded Core Regulon. *J Bacteriol* 196 (3):660–671. doi: [10.1128/JB.01007-13](https://doi.org/10.1128/JB.01007-13).
  60. **Boudvillain M, Figueroa-Bossi N, Bossi L.** Apr 2013. Terminator still moving forward: expanding roles for Rho factor. *Curr Opin Microbiol* 16 (2):118–124. doi: [10.1016/j.mib.2012.12.003](https://doi.org/10.1016/j.mib.2012.12.003).
  61. **Burns CM, Richardson LV, Richardson JP.** May 1998. Combinatorial effects of NusA and NusG on transcription elongation and rho-dependent termination in Escherichia coli. *J Mol Biol* 278 (2):307–316. doi: [10.1006/jmbi.1998.1691](https://doi.org/10.1006/jmbi.1998.1691).
  62. **Mondal S, Yakhnin AV, Babitzke P.** 2017. Modular Organization of the NusA- and NusG-Stimulated RNA Polymerase Pause Signal That Participates in the Bacillus subtilis trp Operon Attenuation Mechanism. *J Bacteriol* 199 (14). doi: [10.1128/JB.00223-17](https://doi.org/10.1128/JB.00223-17).
  63. **Lawson MR, Berger JM.** Jun 2019. Tuning the sequence specificity of a transcription terminator. *Curr Genet* 65 (3):729–733. doi: [10.1007/s00294-019-00939-1](https://doi.org/10.1007/s00294-019-00939-1).
  64. **Merino E, Yanofsky C.** May 2005. Transcription attenuation: a highly conserved regulatory strategy used by bacteria. *Trends genetics: TIG* 21 (5):260–264. doi: [10.1016/j.tig.2005.03.002](https://doi.org/10.1016/j.tig.2005.03.002).
  65. **Turnbough CL.** 2019. Regulation of Bacterial Gene Expression by Transcription Attenuation. *Microbiol molecular biology reviews: MMBR* 83 (3). doi: [10.1128/MMBR.00019-19](https://doi.org/10.1128/MMBR.00019-19).
  66. **Green NJ, Grundy FJ, Henkin TM.** Jan 2010. The T box mechanism: tRNA as a regulatory molecule. *FEBS letters* 584 (2):318–324. doi: [10.1016/j.febslet.2009.11.056](https://doi.org/10.1016/j.febslet.2009.11.056).
  67. **Zhang J, Chetnani B, Cormack ED, Alonso D, Liu W, Mondragón A, Fei J.** Sep 2018. Specific structural elements of the T-box riboswitch drive the two-step binding of the tRNA ligand. *eLife* 7:e39518. doi: [10.7554/eLife.39518](https://doi.org/10.7554/eLife.39518).
  68. **Millman A, Dar D, Shamir M, Sorek R.** Jan 2017. Computational prediction of regulatory, premature transcription termination in bacteria. *Nucleic Acids Res* 45 (2):886–893. doi: [10.1093/nar/gkw749](https://doi.org/10.1093/nar/gkw749).
  69. **Proshkin S, Mironov A, Nudler E.** Oct 2014. Riboswitches in regulation of Rho-dependent transcription termination. *Biochimica Et Biophys Acta* 1839 (10):974–977. doi: [10.1016/j.bbagr.2014.04.002](https://doi.org/10.1016/j.bbagr.2014.04.002).
  70. **Coburn GA, Miao X, Briant DJ, Mackie GA.** Oct 1999. Reconstitution of a minimal RNA degradosome demonstrates functional coordination between a 3' exonuclease and a DEAD-box RNA helicase. *Genes & Dev* 13 (19):2594–2603. doi: [10.1101/gad.13.19.2594](https://doi.org/10.1101/gad.13.19.2594).
  71. **Py B, Higgins CF, Krisch HM, Carpousis AJ.** May 1996. A DEAD-box RNA helicase in the Escherichia coli RNA degradosome. *Nature* 381 (6578):169–172. doi: [10.1038/381169a0](https://doi.org/10.1038/381169a0).
  72. **Hauryliuk V, Atkinson GC, Murakami KS, Tenson T, Gerdes K.** May 2015. Recent functional insights into the role of (p)ppGpp in bacterial physiology. *Nat Rev Microbiol* 13 (5):298–309. doi: [10.1038/nrmicro3448](https://doi.org/10.1038/nrmicro3448).
  73. **Nasser W, Shevchik VE, Hugouvieux-Cotte-Pattat N.** Nov 1999. Analysis of three clustered polygalacturonase genes in Erwinia chrysanthemi 3937 revealed an anti-repressor function for the PecS regulator. *Mol Microbiol* 34 (4):641–650. doi: [10.1046/j.1365-2958.1999.01609.x](https://doi.org/10.1046/j.1365-2958.1999.01609.x).
  74. **de Lorenzo V, Danchin A.** Sep 2008. Synthetic biology: discovering new worlds and new words. The new and not so new aspects of this emerging research field. *EMBO Reports* 9 (9):822–827. doi: [10.1038/embor.2008.159](https://doi.org/10.1038/embor.2008.159).
  75. **Stauffer LT, Fogarty SJ, Stauffer GV.** May 1994. Characterization of the Escherichia coli gcv operon. *Gene* 142 (1):17–22. doi: [10.1016/0378-1119\(94\)90349-2](https://doi.org/10.1016/0378-1119(94)90349-2).
  76. **Kikuchi G, Motokawa Y, Yoshida T, Hiraga K.** Jul 2008. Glycine cleavage system: reaction mechanism, physiological significance, and hyperglycemia. *Proc Jpn Acad Ser B, Phys Biol Sci* 84 (7):246–263. doi: [10.2183/pjab/84.246](https://doi.org/10.2183/pjab/84.246).
  77. **Shevchik VE, Hugouvieux-Cotte-Pattat N.** Jun 1997. Identification of a bacterial pectin acetyl esterase in Erwinia chrysanthemi 3937. *Mol Microbiol* 24 (6):1285–1301. doi: [10.1046/j.1365-2958.1997.4331800.x](https://doi.org/10.1046/j.1365-2958.1997.4331800.x).
  78. **Boccara M, Diolez A, Rouve M, Kotoujansky A.** Jul 1988. The role of individual pectate lyases of Erwinia chrysanthemi strain 3937 in pathogenicity on saintpaulia plants. *Physiol Mol Plant Pathol* 33 (1):95–104. doi: [10.1016/0885-5765\(88\)90046-X](https://doi.org/10.1016/0885-5765(88)90046-X).
  79. **Beaulieu C.** 1993. Pathogenic Behavior of Pectinase-Defective Erwinia chrysanthemi Mutants on Different Plants. *Mol Plant-Microbe Interactions* 6 (2):197. doi: [10.1094/MPMI-6-197](https://doi.org/10.1094/MPMI-6-197).
  80. **Dorel C, Hugouvieux-Cotte-Pattat N, Robert-Baudouy J, Lojkowska E.** Jul 1996. Production of Erwinia chrysanthemi pectinases in potato tubers showing high or low level of resistance to soft-rot. *Eur J Plant Pathol* 102 (6):511–517. doi: [10.1007/BF01877017](https://doi.org/10.1007/BF01877017).
  81. **Grenier AM, Dupont G, Pagès S, Condemine G, Rahbé Y.** Mar 2006. The Phytopathogen Dickeya dadantii (Erwinia chrysanthemi 3937) Is a Pathogen of the Pea Aphid. *Appl Environ Microbiol* 72 (3):1956–1965. doi: [10.1128/AEM.72.3.1956-1965.2006](https://doi.org/10.1128/AEM.72.3.1956-1965.2006).
  82. **Costechareyre D, Dridi B, Rahbé Y, Condemine G.** Dec 2010. Cyt toxin expression reveals an inverse regulation of insect and plant virulence factors of Dickeya dadantii. *Environ Microbiol* 12 (12):3290–3301. doi: [10.1111/j.1462-2920.2010.02305.x](https://doi.org/10.1111/j.1462-2920.2010.02305.x).



Forquet et al.

83. **Sáenz-Lahoya S, Bitarte N, García B, Burgui S, Vergara-Irigaray M, Valle J, Solano C, Toledo-Arana A, Lasa I.** 2019. Noncontiguous operon is a genetic organization for coordinating bacterial gene expression. *Proc Natl Acad Sci United States Am* 116 (5):1733–1738. doi: [10.1073/pnas.1812746116](https://doi.org/10.1073/pnas.1812746116).
84. **Nasser W, Dorel C, Wawrzyniak J, Van Gijsegem F, Groleau MC, Déziel E, Reverchon S.** Mar 2013. Vfm a new quorum sensing system controls the virulence of *Dickeya dadantii*. *Environ Microbiol* 15 (3):865–880. doi: [10.1111/1462-2920.12049](https://doi.org/10.1111/1462-2920.12049).
85. **Toledo-Arana A, Lasa I.** 2020. Advances in bacterial transcriptome understanding: From overlapping transcription to the excludon concept. *Mol Microbiol* 113 (3):593–602. doi: [10.1111/mmi.14456](https://doi.org/10.1111/mmi.14456).
86. **Baltenneck J, Reverchon S, Hommais F.** Jan 2021. Quorum Sensing Regulation in Phytopathogenic Bacteria. *Microorganisms* 9 (2). doi: [10.3390/microorganisms9020239](https://doi.org/10.3390/microorganisms9020239).
87. **Sesto N, Wurtzel O, Archambaud C, Sorek R, Cossart P.** Feb 2013. The excludon: a new concept in bacterial antisense RNA-mediated gene regulation. *Nat Rev Microbiol* 11 (2):75–82. doi: [10.1038/nrmicro2934](https://doi.org/10.1038/nrmicro2934).
88. **Hsu LM, Vo NV, Chamberlin MJ.** Dec 1995. *Escherichia coli* transcript cleavage factors GreA and GreB stimulate promoter escape and gene expression in vivo and in vitro. *Proc Natl Acad Sci United States Am* 92 (25):11588–11592. doi: [10.1073/pnas.92.25.11588](https://doi.org/10.1073/pnas.92.25.11588).
89. **Cai SJ, Inouye M.** Jul 2002. EnvZ-OmpR interaction and osmoregulation in *Escherichia coli*. *The J Biol Chem* 277 (27):24155–24161. doi: [10.1074/jbc.M110715200](https://doi.org/10.1074/jbc.M110715200).
90. **Lybecker M, Zimmermann B, Bilusic I, Tukhtubaeva N, Schroeder R.** Feb 2014. The double-stranded transcriptome of *Escherichia coli*. *Proc Natl Acad Sci United States Am* 111 (8):3134–3139. doi: [10.1073/pnas.1315974111](https://doi.org/10.1073/pnas.1315974111).
91. **Reverchon S, Nasser W.** Oct 2013. *Dickeya* ecology, environment sensing and regulation of virulence programme. *Environ Microbiol Reports* 5 (5):622–636. doi: [10.1111/1758-2229.12073](https://doi.org/10.1111/1758-2229.12073).
92. **Nachin L, Loiseau L, Expert D, Barras F.** Feb 2003. SufC: an unorthodox cytoplasmic ABC/ATPase required for [Fe-S] biogenesis under oxidative stress. *The EMBO J* 22 (3):427–437. doi: [10.1093/emboj/cdg061](https://doi.org/10.1093/emboj/cdg061).
93. **Magnet S, Bellais S, Dubost L, Fourgeaud M, Mainardi JL, Petit-Frère S, Marie A, Mengin-Lecreulx D, Arthur M, Gutmann L.** May 2007. Identification of the I,d-Transpeptidases Responsible for Attachment of the Braun Lipoprotein to *Escherichia coli* Peptidoglycan. *J Bacteriol* 189 (10):3927–3931. doi: [10.1128/JB.00084-07](https://doi.org/10.1128/JB.00084-07).
94. **Roche B, Aussel L, Ezraty B, Mandin P, Py B, Barras F.** Mar 2013. Iron/sulfur proteins biogenesis in prokaryotes: Formation, regulation and diversity. *Biochimica et Biophys Acta (BBA) - Bioenerg* 1827 (3):455–469. doi: [10.1016/j.bbabi.2012.12.010](https://doi.org/10.1016/j.bbabi.2012.12.010).
95. **Collet JF, Cho SH, Iorga BI, Goemans CV.** Aug 2020. How the assembly and protection of the bacterial cell envelope depend on cysteine residues. *The J Biol Chem* 295 (34):11984–11994. doi: [10.1074/jbc.REV120.011201](https://doi.org/10.1074/jbc.REV120.011201).
96. **Leonard S, Meyer S, Lacour S, Nasser W, Hommais F, Reverchon S.** Sep 2019. APERO: a genome-wide approach for identifying bacterial small RNAs from RNA-Seq data. *Nucleic Acids Res* 47 (15):e88. doi: [10.1093/nar/gkz485](https://doi.org/10.1093/nar/gkz485).
97. **Glasner JD, Yang CH, Reverchon S, Hugouvieux-Cotte-Pattat N, Condemine G, Bohin JP, Van Gijsegem F, Yang S, Franza T, Expert D, Plunkett G, San Francisco MJ, Charkowski AO, Py B, Bell K, Rauscher L, Rodriguez-Palenzuela P, Toussaint A, Holeva MC, He SY, Douet V, Boccara M, Blanco C, Toth I, Anderson BD, Biehl BS, Mau B, Flynn SM, Barras F, Lindeberg M, Birch PRJ, Tsuyumu S, Shi X, Hibbing M, Yap MN, Carpentier M, Dassa E, Umehara M, Kim JF, Rusch M, Soni P, Mayhew GF, Fouts DE, Gill SR, Blattner FR, Keen NT, Perna NT.** Apr 2011. Genome Sequence of the Plant-Pathogenic Bacterium *Dickeya dadantii* 3937. *J Bacteriol* 193 (8):2076–2077. doi: [10.1128/JB.01513-10](https://doi.org/10.1128/JB.01513-10).
98. **El Houdaigui B, Forquet R, Hindré T, Schneider D, Nasser W, Reverchon S, Meyer S.** 2019. Bacterial genome architecture shapes global transcriptional regulation by DNA supercoiling. *Nucleic Acids Res* 47 (11):5648–5657. doi: [10.1093/nar/gkz300](https://doi.org/10.1093/nar/gkz300).
99. **Hyatt D, Chen GL, Locascio PF, Land ML, Larimer FW, Hauser LJ.** Mar 2010. Prodigal: prokaryotic gene recognition and translation initiation site identification. *BMC Bioinform* 11:119. doi: [10.1186/1471-2105-11-119](https://doi.org/10.1186/1471-2105-11-119).
100. **Hommais F, Oger-Desfeux C, Gijsegem FV, Castang S, Ligorì S, Expert D, Nasser W, Reverchon S.** Nov 2008. PecS Is a Global Regulator of the Symptomatic Phase in the Phytopathogenic Bacterium *Erwinia chrysanthemi* 3937. *J Bacteriol* 190 (22):7508–7522. doi: [10.1128/JB.00553-08](https://doi.org/10.1128/JB.00553-08).
101. **De Coster W, D'Hert S, Schultz DT, Cruts M, Van Broeckhoven C.** Aug 2018. NanoPack: visualizing and processing long-read sequencing data. *Bioinformatics* 34 (15):2666–2669. doi: [10.1093/bioinformatics/bty149](https://doi.org/10.1093/bioinformatics/bty149).
102. **Li H.** Sep 2018. Minimap2: pairwise alignment for nucleotide sequences. *Bioinformatics* 34 (18):3094–3100. doi: [10.1093/bioinformatics/bty191](https://doi.org/10.1093/bioinformatics/bty191).
